# Supplementary material for: Computational mechanistic analysis of a cationic Suzuki–Miyaura reaction without added base
Source: Royal Society of Chemistry journal article supplement (doi:10.1039/d2cy01780f), 2022-12-31
Supplement: d2cy01780f1.pdf [file d2cy01780f1.pdf]

# Computational Mechanistic Analysis of a Cationic Suzuki-Miyaura Reaction Without Added Base

Tolga Yaman<sup>a</sup> and Jeremy N. Harvey<sup>\*a</sup>

## Content:

- A. Details of the scan calculations relating to the reaction steps described in the main text in Figs. 5 and 6.
- B. Optimized Cartesian Coordinates for all species.

## A. Scan Calculations

In the main text, we discuss conversion of the ion pair  $\mathbf{11}^+ \bullet \text{BF}_4^-$  ( $\text{ArPdL}^+ \text{-O}(\text{B}(\text{OH})_2)\text{-B}(\text{OH})\text{Ar}'$ ) to form  $\text{B}(\text{OH})_2\text{F}$ ,  $\text{BF}_3$  and  $\mathbf{3}$  ( $\text{ArPdL-OB}(\text{OH})\text{Ar}'$ ). This transformation is described in the text as occurring in two steps, with first fluoride transfer from  $\text{BF}_4^-$  to the  $\text{B}(\text{OH})_2$  moiety in  $\mathbf{11}^+$  to yield  $\mathbf{12}'$  ( $\text{ArPdL-O}(\text{B}(\text{OH})_2\text{F})\text{-B}(\text{OH})\text{Ar}'$ ) and  $\text{BF}_3$ , followed by loss of  $\text{B}(\text{OH})_2\text{F}$  to yield  $\mathbf{3}$ . Both of these steps are suggested to have no barrier (or possibly a very small barrier) above the endothermicity. We have studied the thermochemistry of this conversion using the full  $\text{P}(\text{Ad})_3$  model with  $\mathbf{11}^+$  and  $\text{BF}_4^-$  as starting species, but were unable to locate any TSs. In order to check the feasibility of the process, as also mentioned in the text, we studied the same transformation but using a model species in which the bulky  $\text{P}(\text{Ad})_3$  ligand is replaced by two  $\text{PH}_3$  ligands (with the corresponding starting species therefore being  $\mathbf{11}^+ \bullet \text{BF}_4^-$ ). With this smaller model system, we carried out scan calculations mapping out the reaction profile from  $\mathbf{11}^+ \bullet \text{BF}_4^-$  to  $\mathbf{12}' + \text{BF}_3$  then from  $\mathbf{12}'$  to  $\mathbf{3}' + \text{B}(\text{OH})_2\text{F}$ .

The graph depicted below shows the electronic energy at the same B3LYP-D3BJ/6-31G(d), SDD level of theory used in the main study, for species lying along the scan calculation for the conversion of  $\mathbf{11}^+ \bullet \text{BF}_4^-$  to  $\text{BF}_3 + \mathbf{12}'$ . Three-dimensional structure representations of key species along this scan are shown below. The scan starts with the complex of  $\mathbf{11}^+ \bullet \text{BF}_4^-$ . The x-axis coordinate is the distance between the boron of tetrafluoroborate and the fluoride that is migrating from boron to oxygen, which is the coordinate used in the relaxed scan calculations. Hydrogens are omitted for clarity. The final species in the plot corresponds to a complex between  $\mathbf{12}'$  and  $\text{BF}_3$ ; removal of  $\text{BF}_3$  from this species is assumed to occur without a barrier but no scan has been performed. Separate calculations of  $\mathbf{12}'$  and  $\text{BF}_3$  show that their sum of electronic energies are considerably higher ( $14.2 \text{ kcal mol}^{-1}$ ) than the last species of the scan where they are separated. Here, it must be stated that while modeling the real system, we have modeled the Lewis acidic species  $\text{BF}_3$  as its complex with an external molecule of solvent,  $\text{BF}_3\text{-THF}$ . Also, we treated  $\mathbf{11}^+$  and  $\text{BF}_4^-$  separately in the real system. When electronic energy of the final species in the relaxed scan is compared with the sum of  $\mathbf{12}'$  and  $\text{BF}_3\text{-THF}$ , the sum of the energies of the latter species in fact lie lower than the former ( $-11.2 \text{ kcal mol}^{-1}$ ). When the real system data (electronic energy) is analyzed between the cases of modeling the  $\text{BF}_3$  as itself and as  $\text{BF}_3\text{-THF}$ , in the first case, the transformation of  $\mathbf{11}^+ + \text{BF}_4^-$  to  $\text{BF}_3 + \mathbf{12}$  is uphill by  $7.9 \text{ kcal mol}^{-1}$ . On the other hand, electronic energy comparison of the same transformation using an externally solvated  $\text{BF}_3$  would make the transformation downhill by  $17.5 \text{ kcal mol}^{-1}$ . Comparison of the electronic energies of the transformation including an externally solvated  $\text{BF}_3$  using larger basis sets of Def2TZVP and Def2QZVP yields a result that is downhill by  $5.9 \text{ kcal mol}^{-1}$ . Comparing the Gibbs energies of the same transformation in the real system, using the described larger basis sets,  $\mathbf{12} + \text{BF}_3\text{-THF}$  is shown to have a higher Gibbs free energy than  $\mathbf{11}^+ + \text{BF}_4^-$  by  $4.2 \text{ kcal mol}^{-1}$ .

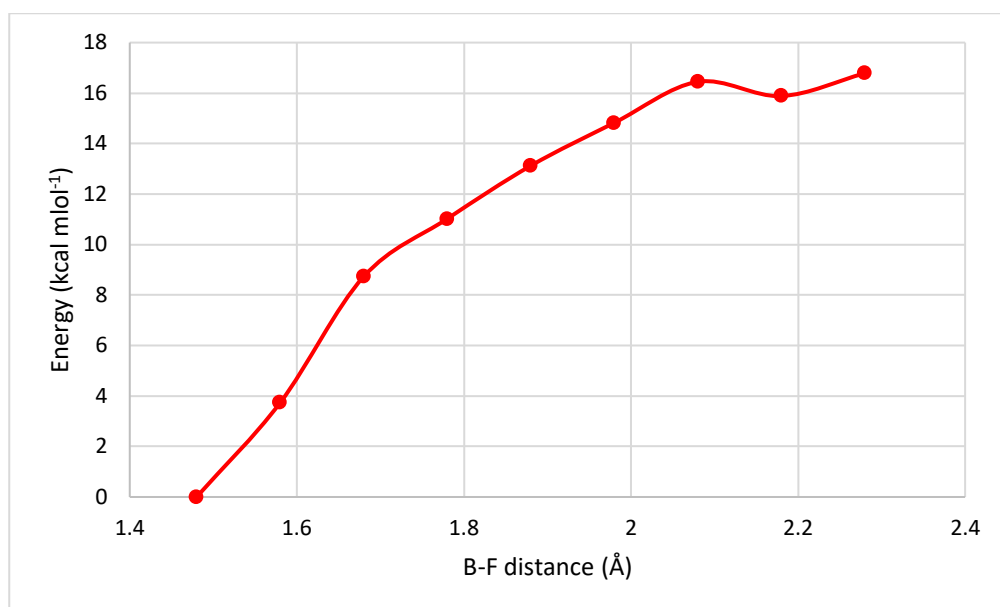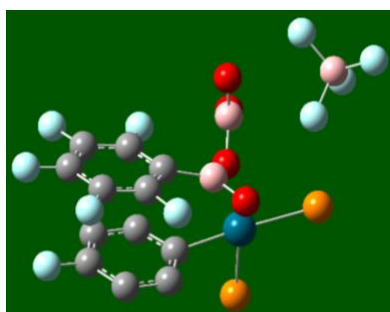

B-F distance: 1.48 Å

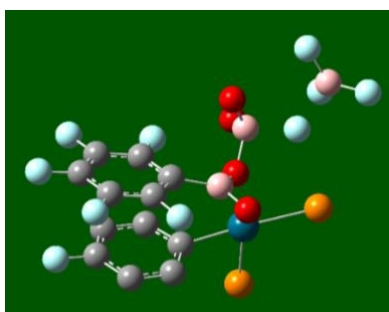

B-F distance: 1.88 Å

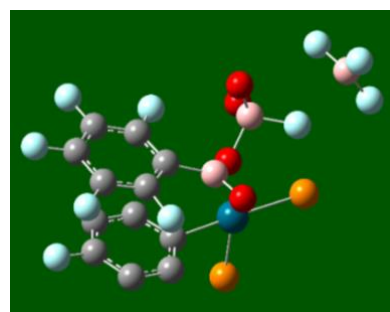

B-F distance: 2.28 Å

The graph depicted below shows the electronic energy at the same B3LYP-D3BJ/6-31G(d), SDD level of theory used in the main study, for species lying along the scan calculation for the conversion of **12'** to **3'**. Three-dimensional structure representations of key species along this scan are shown below. Scan starts with the complex of **12'** with  $\text{PH}_3$  as the ligand. The values in x-axis are the distances between the boron of  $\text{B(OH)}_2\text{F}$  and the oxygen of the arylboronic acid moiety that the  $\text{B(OH)}_2\text{F}$  boron is coordinated. The selected species are shown below the graph. Hydrogens are omitted for clarity. Separate calculations of **3'** and  $\text{B(OH)}_2\text{F}$  show that their sum of energies are considerably higher ( $15.1 \text{ kcal mol}^{-1}$ ) than the last species of the scan where they are separated. Comparing these calculations with the real system, similar results can be seen in terms of comparison of electronic energies between **12** and sum of **3** and  $\text{B(OH)}_2\text{F}$ . The dissociation-like reaction is uphill in terms of electronic energy by  $18.9 \text{ kcal mol}^{-1}$ . When the larger basis sets (Def2TZVP, Def2QZVP) are used for the calculations, the transformation is uphill in terms of electronic energy by  $12.2 \text{ kcal mol}^{-1}$ . The transformation is downhill in terms of Gibbs free energy (using larger basis sets) by  $2.2 \text{ kcal mol}^{-1}$ .

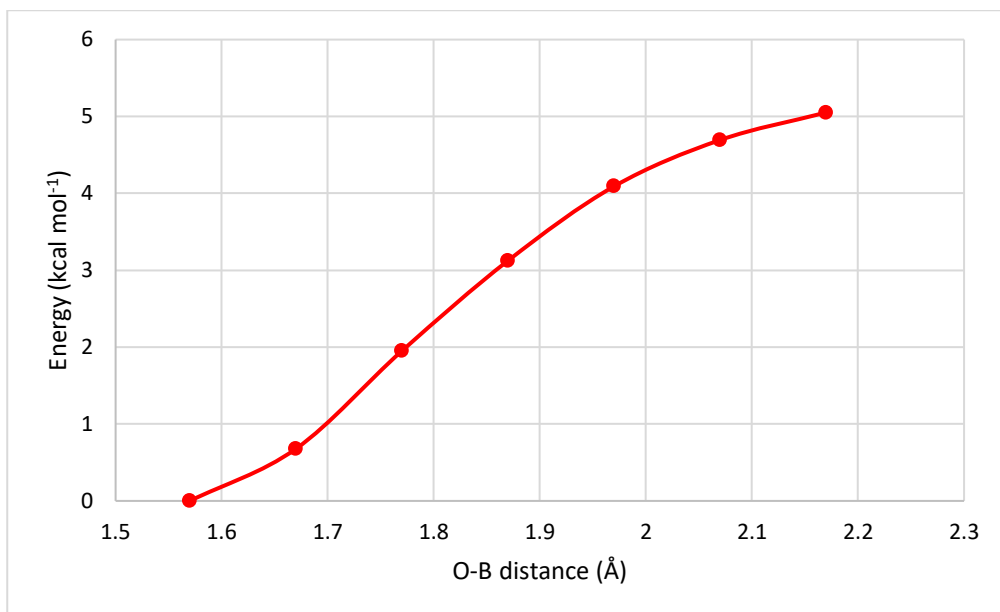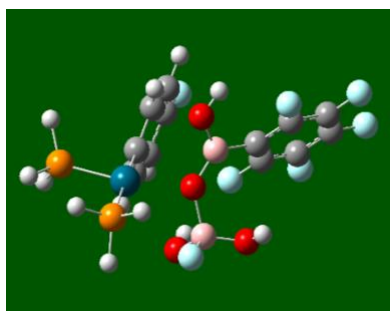

O-B distance: 1.57 Å

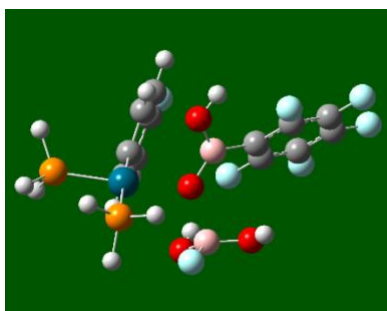

O-B distance: 1.87 Å

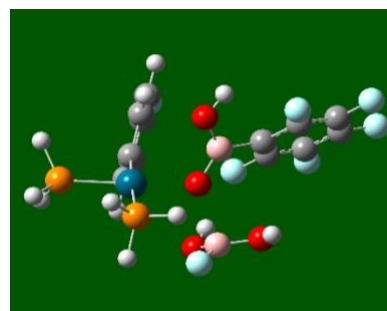

O-B distance: 2.17 Å

## B. Optimized Cartesian Coordinates

For the Cartesian coordinates, E denotes the electronic energy of the species that is obtained after the optimization. G denotes the Gibbs free energy of the species that was found by the summation of E and the free energy correction using the quasi-harmonic approximation at 298 K. Esp is the energy obtained from the single point calculations that utilized larger basis sets, and ZPE denotes the zero-point energy of the species. All values are in atomic units.

|                          |         |          |          |                          |          |          |          |
|--------------------------|---------|----------|----------|--------------------------|----------|----------|----------|
| <b>TS-0</b>              |         |          | C        | 1.39727                  | -2.61933 | 1.54219  |          |
| E: -2874.60346           |         |          | C        | 2.10433                  | -0.62669 | 2.89387  |          |
| G: -2873.80373           |         |          | H        | 1.26637                  | -3.03697 | 0.54134  |          |
| Esp: -2875.63222         |         |          | C        | 0.02698                  | -2.58003 | 2.24022  |          |
| Gcorr: 0.79973           |         |          | C        | 2.34090                  | -3.52031 | 2.36663  |          |
| ZPE: 0.86507             |         |          | H        | 2.52031                  | 0.37942  | 2.89034  |          |
| Esp + Gcorr: -2874.83249 |         |          | C        | 0.71830                  | -0.59543 | 3.55854  |          |
|                          |         |          | C        | 3.04997                  | -1.52622 | 3.71840  |          |
|                          |         |          | H        | -0.39192                 | -3.59419 | 2.25691  |          |
|                          |         |          | H        | -0.67479                 | -1.96864 | 1.67149  |          |
|                          |         |          | C        | 0.15753                  | -2.02301 | 3.66214  |          |
| P                        | 1.33719 | -0.09083 | 0.10679  | H                        | 3.32419  | -3.58489 | 1.88137  |
| C                        | 1.92511 | 1.59732  | 0.71175  | H                        | 1.93112  | -4.53834 | 2.40562  |
| H                        | 1.40732 | 1.60373  | 1.67867  | C                        | 2.49004  | -2.95639 | 3.79288  |
| C                        | 1.44634 | 2.89608  | 0.00651  | H                        | 0.03086  | 0.03115  | 2.97429  |
| C                        | 3.44713 | 1.76392  | 1.01421  | H                        | 0.80573  | -0.13956 | 4.55380  |
| H                        | 0.40987 | 2.79734  | -0.28862 | H                        | 4.04962  | -1.52814 | 3.26324  |
| C                        | 2.28388 | 3.28487  | -1.22397 | H                        | 3.15535  | -1.11019 | 4.72944  |
| C                        | 1.56144 | 4.03031  | 1.05013  | H                        | -0.83004 | -1.99872 | 4.14041  |
| H                        | 3.86725 | 0.84226  | 1.42555  | C                        | 1.11220  | -2.91158 | 4.48044  |
| C                        | 4.27432 | 2.16879  | -0.22232 | H                        | 3.17300  | -3.59164 | 4.37118  |
| C                        | 3.57166 | 2.89600  | 2.05956  | H                        | 1.21650  | -2.52062 | 5.50195  |
| H                        | 1.87639 | 4.21533  | -1.64174 | H                        | 0.69771  | -3.92539 | 4.56175  |
| H                        | 2.20272 | 2.52831  | -2.01335 | Pd                       | -1.01310 | -0.46774 | -0.24707 |
| C                        | 3.75374 | 3.48340  | -0.82133 | C                        | -1.47867 | 1.46104  | -0.09199 |
| H                        | 0.93683 | 3.79645  | 1.92149  | C                        | -1.69181 | 2.02224  | 1.17319  |
| H                        | 1.17469 | 4.96288  | 0.61813  | C                        | -1.68113 | 2.25351  | -1.23024 |
| C                        | 3.03020 | 4.21486  | 1.47208  | C                        | -2.06570 | 3.36410  | 1.30793  |
| H                        | 4.25828 | 1.38838  | -0.98243 | H                        | -1.55650 | 1.42575  | 2.07071  |
| H                        | 5.32189 | 2.28442  | 0.08698  | C                        | -2.05709 | 3.59490  | -1.11161 |
| H                        | 3.01769 | 2.63125  | 2.97012  | H                        | -1.52572 | 1.84011  | -2.22087 |
| H                        | 4.62530 | 3.01785  | 2.34463  | C                        | -2.23374 | 4.12661  | 0.15978  |
| H                        | 4.35073 | 3.74705  | -1.70366 | H                        | -2.22101 | 3.81380  | 2.28383  |
| C                        | 3.85875 | 4.60064  | 0.23228  | H                        | -2.20421 | 4.22177  | -1.98570 |
| H                        | 3.10254 | 5.00780  | 2.22736  | F                        | -2.58589 | 5.43265  | 0.28327  |
| H                        | 4.90996 | 4.75328  | 0.51225  | B                        | -1.83048 | -2.25796 | -1.47758 |
| H                        | 3.49194 | 5.54892  | -0.18325 | O                        | -1.07262 | -2.76894 | -0.60812 |
| C                        | 2.27012 | -0.41711 | -1.50147 | C                        | -3.12295 | -0.74643 | -0.44412 |
| H                        | 2.40282 | 0.61698  | -1.82974 | C                        | -3.76124 | -1.10819 | 0.74133  |
| C                        | 1.46684 | -1.10199 | -2.63518 | C                        | -3.95562 | -0.16434 | -1.39398 |
| C                        | 3.68643 | -1.05020 | -1.44799 | C                        | -5.11446 | -0.89480 | 0.98125  |
| H                        | 0.44173 | -0.71086 | -2.63657 | C                        | -5.31130 | 0.06459  | -1.21622 |
| C                        | 1.44212 | -2.63213 | -2.48642 | C                        | -5.89424 | -0.30049 | -0.00541 |
| C                        | 2.16143 | -0.73882 | -3.96498 | F                        | -7.19889 | -0.09201 | 0.20126  |
| H                        | 4.25791 | -0.63641 | -0.61146 | F                        | -3.05503 | -1.65429 | 1.75802  |
| C                        | 3.64871 | -2.58473 | -1.32573 | F                        | -5.67475 | -1.24090 | 2.15063  |
| C                        | 4.38696 | -0.68881 | -2.77896 | F                        | -3.44137 | 0.17846  | -2.61620 |
| H                        | 0.85556 | -3.06105 | -3.31003 | F                        | -6.06158 | 0.62042  | -2.17924 |
| H                        | 0.93557 | -2.91261 | -1.56136 | O                        | -2.31981 | -2.33640 | -2.72464 |
| C                        | 2.87322 | -3.19145 | -2.50630 | H                        | -2.76208 | -1.52151 | -3.01794 |
| H                        | 2.16564 | 0.35096  | -4.10296 |                          |          |          |          |
| H                        | 1.59979 | -1.17076 | -4.80403 | <b>0</b>                 |          |          |          |
| C                        | 3.60369 | -1.28277 | -3.96613 | E: -2874.60754           |          |          |          |
| H                        | 3.18889 | -2.89406 | -0.38435 | G: -2873.80885           |          |          |          |
| H                        | 4.68039 | -2.96137 | -1.31520 | Esp: -2875.63699         |          |          |          |
| H                        | 4.46059 | 0.40131  | -2.88486 | Gcorr: 0.79869           |          |          |          |
| H                        | 5.41172 | -1.08340 | -2.77194 | ZPE: 0.86495             |          |          |          |
| H                        | 2.84217 | -4.28329 | -2.40036 | Esp + Gcorr: -2874.83830 |          |          |          |
| C                        | 3.56433 | -2.81593 | -3.82879 |                          |          |          |          |
| H                        | 4.10006 | -1.00597 | -4.90484 | P                        | 1.33577  | -0.12426 | 0.11080  |
| H                        | 4.58484 | -3.22201 | -3.85155 | C                        | 2.00158  | 1.60175  | 0.47914  |
| H                        | 3.02056 | -3.25552 | -4.67586 | H                        | 1.44606  | 1.78276  | 1.40781  |
| C                        | 2.04751 | -1.21169 | 1.45441  |                          |          |          |          |
| H                        | 3.08690 | -1.34409 | 1.13408  |                          |          |          |          |

|    |          |          |          |
|----|----------|----------|----------|
| C  | 1.60897  | 2.78812  | -0.44433 |
| C  | 3.51369  | 1.75631  | 0.82596  |
| H  | 0.58119  | 2.67799  | -0.77208 |
| C  | 2.51654  | 2.94943  | -1.67650 |
| C  | 1.73003  | 4.06873  | 0.41377  |
| H  | 3.87200  | 0.89513  | 1.39724  |
| C  | 4.41006  | 1.93009  | -0.41658 |
| C  | 3.64381  | 3.03380  | 1.68678  |
| H  | 2.17005  | 3.81861  | -2.25180 |
| H  | 2.43701  | 2.08395  | -2.34451 |
| C  | 3.97514  | 3.15339  | -1.23683 |
| H  | 1.06033  | 3.99864  | 1.27900  |
| H  | 1.40431  | 4.93634  | -0.17541 |
| C  | 3.18606  | 4.26242  | 0.87464  |
| H  | 4.38953  | 1.04247  | -1.04777 |
| H  | 5.44835  | 2.05240  | -0.07945 |
| H  | 3.04017  | 2.93588  | 2.59911  |
| H  | 4.68849  | 3.16158  | 2.00116  |
| H  | 4.62057  | 3.25235  | -2.11898 |
| C  | 4.08480  | 4.41772  | -0.36604 |
| H  | 3.25939  | 5.16125  | 1.50019  |
| H  | 5.12863  | 4.57262  | -0.06064 |
| H  | 3.77975  | 5.30204  | -0.94173 |
| C  | 2.31934  | -0.74001 | -1.37918 |
| H  | 2.49720  | 0.22321  | -1.86505 |
| C  | 1.53991  | -1.57670 | -2.42345 |
| C  | 3.71473  | -1.38952 | -1.17317 |
| H  | 0.52626  | -1.16819 | -2.52557 |
| C  | 1.47667  | -3.06687 | -2.04528 |
| C  | 2.28754  | -1.43546 | -3.76672 |
| H  | 4.26491  | -0.86817 | -0.38428 |
| C  | 3.63561  | -2.88743 | -0.82444 |
| C  | 4.47275  | -1.24710 | -2.51430 |
| H  | 0.90125  | -3.60860 | -2.80894 |
| H  | 0.95272  | -3.19404 | -1.09721 |
| C  | 2.89312  | -3.65096 | -1.93254 |
| H  | 2.31914  | -0.38003 | -4.06897 |
| H  | 1.74710  | -1.98235 | -4.55095 |
| C  | 3.71734  | -1.99624 | -3.63016 |
| H  | 3.12982  | -3.04394 | 0.13157  |
| H  | 4.65663  | -3.27633 | -0.71296 |
| H  | 4.57972  | -0.18726 | -2.77870 |
| H  | 5.48566  | -1.65812 | -2.40904 |
| H  | 2.83054  | -4.71372 | -1.66659 |
| C  | 3.63799  | -3.49048 | -3.26851 |
| H  | 4.25249  | -1.87108 | -4.57988 |
| H  | 4.64862  | -3.91383 | -3.19096 |
| H  | 3.11409  | -4.04225 | -4.06071 |
| C  | 1.93827  | -1.06792 | 1.63558  |
| H  | 2.98154  | -1.29694 | 1.39247  |
| C  | 1.20495  | -2.41318 | 1.88854  |
| C  | 1.96259  | -0.28348 | 2.97750  |
| H  | 1.10457  | -2.96841 | 0.95279  |
| C  | -0.19492 | -2.20158 | 2.49171  |
| C  | 2.04992  | -3.23127 | 2.88787  |
| H  | 2.43798  | 0.68843  | 2.85132  |
| C  | 0.55048  | -0.08291 | 3.55111  |
| C  | 2.81008  | -1.10040 | 3.97633  |
| H  | -0.67575 | -3.17840 | 2.63038  |
| H  | -0.83072 | -1.63750 | 1.80400  |
| C  | -0.10178 | -1.44799 | 3.82375  |
| H  | 3.05048  | -3.41652 | 2.47433  |
| H  | 1.57910  | -4.21022 | 3.04908  |
| C  | 2.16096  | -2.47239 | 4.22402  |
| H  | -0.06702 | 0.48725  | 2.84587  |
| H  | 0.61528  | 0.50613  | 4.47572  |
| H  | 3.82889  | -1.22342 | 3.58470  |
| H  | 2.89089  | -0.54631 | 4.92125  |
| H  | -1.10897 | -1.30137 | 4.23377  |
| C  | 0.75498  | -2.25610 | 4.81551  |
| H  | 2.77437  | -3.05077 | 4.92662  |
| H  | 0.83001  | -1.72525 | 5.77449  |
| H  | 0.27724  | -3.22433 | 5.01711  |
| Pd | -1.07414 | -0.34217 | -0.18637 |

|   |          |          |          |
|---|----------|----------|----------|
| C | -1.44839 | 1.61103  | -0.22728 |
| C | -1.53574 | 2.34337  | 0.96296  |
| C | -1.68289 | 2.26885  | -1.44441 |
| C | -1.80525 | 3.71649  | 0.94374  |
| H | -1.38451 | 1.85683  | 1.92112  |
| C | -1.94698 | 3.64119  | -1.47950 |
| H | -1.64185 | 1.72180  | -2.38009 |
| C | -1.99543 | 4.34145  | -0.28070 |
| H | -1.86108 | 4.29444  | 1.86111  |
| H | -2.11326 | 4.16173  | -2.41769 |
| F | -2.24367 | 5.67722  | -0.30767 |
| B | -1.67478 | -2.60637 | -1.46609 |
| O | -1.14748 | -2.77416 | -0.36168 |
| C | -3.14917 | -0.44039 | -0.26882 |
| C | -3.85782 | -0.56122 | 0.92135  |
| C | -3.94120 | -0.30779 | -1.39584 |
| C | -5.24637 | -0.55302 | 0.99560  |
| C | -5.33117 | -0.29953 | -1.39179 |
| C | -5.99036 | -0.42030 | -0.17379 |
| F | -7.33059 | -0.41673 | -0.12601 |
| F | -3.19251 | -0.66983 | 2.10169  |
| F | -5.88233 | -0.66626 | 2.17380  |
| F | -3.35054 | -0.19234 | -2.64327 |
| F | -6.03641 | -0.18022 | -2.52862 |
| O | -2.18392 | -2.61047 | -2.67631 |
| H | -2.61821 | -1.76403 | -2.92021 |

1 (ArPd<sup>+</sup>L-THF)

E: -2203.13462

G: -2202.28174

Esp: -2203.84495

Gcorr: 0.85289

ZPE: 0.91219

Esp + Gcorr: -2202.99206

|   |          |          |          |
|---|----------|----------|----------|
| P | 0.73931  | -0.15690 | 0.12544  |
| C | 1.06161  | 1.26994  | 1.30493  |
| H | 0.26232  | 1.05151  | 2.02488  |
| C | 0.78033  | 2.70898  | 0.78563  |
| C | 2.38318  | 1.30428  | 2.13032  |
| H | -0.09003 | 2.71105  | 0.12974  |
| C | 1.98051  | 3.33310  | 0.04576  |
| C | 0.48009  | 3.56923  | 2.03331  |
| H | 2.67629  | 0.30127  | 2.44472  |
| C | 3.56132  | 1.94487  | 1.37888  |
| C | 2.07965  | 2.15802  | 3.38324  |
| H | 1.70148  | 4.34751  | -0.26795 |
| H | 2.22466  | 2.77949  | -0.86542 |
| C | 3.21265  | 3.38102  | 0.96143  |
| H | -0.39393 | 3.16627  | 2.55945  |
| H | 0.22596  | 4.59008  | 1.71994  |
| C | 1.70783  | 3.59395  | 2.96404  |
| H | 3.82953  | 1.35103  | 0.50045  |
| H | 4.43731  | 1.94403  | 2.04051  |
| H | 1.26205  | 1.70226  | 3.95788  |
| H | 2.96343  | 2.17630  | 4.03414  |
| H | 4.05738  | 3.82383  | 0.41955  |
| C | 2.89748  | 4.22048  | 2.21267  |
| H | 1.47902  | 4.18785  | 3.85757  |
| H | 3.77708  | 4.26305  | 2.86881  |
| H | 2.65752  | 5.25196  | 1.92248  |
| C | 1.39615  | 0.25521  | -1.57658 |
| H | 1.16500  | 1.32611  | -1.56583 |
| C | 0.58532  | -0.31993 | -2.76949 |
| C | 2.90707  | 0.10855  | -1.87875 |
| H | -0.48389 | -0.27406 | -2.53673 |
| C | 0.96980  | -1.76825 | -3.10044 |
| C | 0.89614  | 0.56785  | -3.99276 |
| H | 3.49776  | 0.45733  | -1.02992 |
| C | 3.28932  | -1.34554 | -2.20347 |
| C | 3.21352  | 0.98841  | -3.11034 |

H 0.39349 -2.09818 -3.97491  
H 0.69454 -2.43372 -2.27736  
C 2.47599 -1.85343 -3.40914  
H 0.60285 1.60617 -3.78780  
H 0.30588 0.22467 -4.85237  
C 2.40008 0.49444 -4.32125  
H 3.13981 -1.98924 -1.33248  
H 4.36059 -1.38306 -2.43973  
H 2.97271 2.03692 -2.89244  
H 4.28729 0.94023 -3.33275  
H 2.75111 -2.89282 -3.62641  
C 2.78382 -0.96601 -4.63126  
H 2.61710 1.12656 -5.19094  
H 3.85136 -1.02743 -4.88052  
H 2.22441 -1.32361 -5.50582  
C 1.50544 -1.63008 1.00275  
H 2.58395 -1.42674 0.99490  
C 1.26759 -2.99793 0.31907  
C 1.04632 -1.75664 2.49098  
H 1.53947 -2.94650 -0.73224  
C -0.19448 -3.45214 0.44554  
C 2.16978 -4.04523 1.00599  
H 1.15118 -0.80384 3.01121  
C -0.41384 -2.22681 2.61738  
C 1.95954 -2.79939 3.17013  
H -0.33262 -4.40328 -0.08229  
H -0.88387 -2.75307 -0.08756  
C -0.59551 -3.58419 1.92166  
H 3.22130 -3.74968 0.90087  
H 2.05111 -5.01191 0.50038  
C 1.79013 -4.17003 2.49022  
H -1.10047 -1.48512 2.18139  
H -0.66904 -2.30971 3.68117  
H 3.00658 -2.47431 3.11433  
H 1.69666 -2.86880 4.23334  
H -1.64087 -3.90682 1.99382  
C 0.32161 -4.62479 2.59636  
H 2.44047 -4.90611 2.97763  
H 0.03527 -4.73871 3.64964  
H 0.19665 -5.60444 2.11721  
Pd -1.43668 -0.75433 -0.13092  
C -2.00960 1.14099 -0.20532  
C -2.49426 1.72054 0.97353  
C -2.05118 1.86516 -1.40171  
C -3.02471 3.01412 0.96140  
H -2.45200 1.18151 1.91518  
C -2.57693 3.16156 -1.42481  
H -1.66760 1.44260 -2.32380  
C -3.04988 3.71115 -0.24004  
H -3.40056 3.48079 1.86630  
H -2.61350 3.73967 -2.34281  
F -3.54999 4.97022 -0.25576  
C -4.34734 -1.45491 0.76939  
O -3.47416 -1.47330 -0.40420  
C -4.23455 -1.09508 -1.59823  
C -5.56866 -0.58154 -1.07366  
C -5.76066 -1.41090 0.20455  
H -4.11706 -2.34696 1.35604  
H -4.11738 -0.55885 1.35343  
H -3.65614 -0.34884 -2.14389  
H -4.34404 -1.99742 -2.20812  
H -5.49402 0.48393 -0.82918  
H -6.37275 -0.71858 -1.80131  
H -6.46441 -0.95901 0.90840  
H -6.10934 -2.42023 -0.04023

**2 (Ar'B(OH)<sub>2</sub>)**

E: -904.42577  
G: -904.37590  
Esp: -904.85265  
Gcorr: 0.04988  
ZPE: 0.08464  
Esp + Gcorr: -904.80278

B -2.49540 -0.00000 0.00001  
O -3.21594 1.15514 0.04256  
H -2.65290 1.94247 0.06274  
O -3.21582 -1.15510 -0.04254  
H -2.65270 -1.94242 -0.06289  
C -0.90221 0.00006 -0.00001  
C -0.14920 1.17758 -0.00509  
C -0.14924 -1.17756 0.00508  
C 1.23959 1.20260 -0.00573  
C 1.23955 -1.20265 0.00574  
C 1.93865 -0.00003 -0.00001  
F 3.27248 0.00006 0.00000  
F -0.76703 2.38335 -0.00943  
F 1.90497 2.36327 -0.01107  
F -0.76703 -2.38335 0.00943  
F 1.90483 -2.36336 0.01109

**3 (ArPdL-OB(OH)Ar')**

E: -2874.64663  
G: -2873.84522  
Esp: -2875.67854  
Gcorr: 0.80142  
ZPE: 0.86691  
Esp + Gcorr: -2874.87712

P -1.38915 -0.11291 0.12172  
C -2.37766 1.44751 -0.25743  
H -2.32978 1.38308 -1.35228  
C -1.72331 2.80960 0.10904  
C -3.89239 1.53324 0.09590  
H -0.64676 2.76469 -0.04602  
C -2.01327 3.24824 1.55831  
C -2.32766 3.86197 -0.84599  
H -4.38839 0.57447 -0.06312  
C -4.16457 1.98887 1.53834  
C -4.50002 2.57878 -0.86786  
H -1.52831 4.21833 1.73009  
H -1.58285 2.55042 2.28191  
C -3.52699 3.36291 1.79371  
H -2.10211 3.59173 -1.88516  
H -1.86057 4.83762 -0.65754  
C -3.84996 3.95586 -0.62902  
H -3.78482 1.25434 2.25427  
H -5.25105 2.04230 1.68893  
H -4.35065 2.26037 -1.90835  
H -5.58334 2.64375 -0.70040  
H -3.71753 3.67286 2.82890  
C -4.12549 4.39593 0.82147  
H -4.27708 4.68808 -1.32577  
H -5.20726 4.48767 0.98862  
H -3.68315 5.38435 1.00458  
C -0.64071 0.01487 1.83437  
H -0.39015 1.08162 1.80139  
C 0.72124 -0.70791 2.01448  
C -1.49882 -0.22089 3.09974  
H 1.30801 -0.60174 1.09879  
C 0.56621 -2.20037 2.33571  
C 1.44584 -0.02154 3.19224  
H -2.48353 0.23459 2.98029  
C -1.66273 -1.71873 3.41190  
C -0.77019 0.45238 4.28373  
H 1.56064 -2.63348 2.48752  
H 0.12696 -2.72754 1.48530  
C -0.28312 -2.37613 3.60670  
H 1.59271 1.04477 2.97274  
H 2.43873 -0.46637 3.32398  
C 0.61565 -0.18960 4.47980  
H -2.22398 -2.21982 2.61826  
H -2.25549 -1.82495 4.33013  
H -0.66693 1.52947 4.09800

|    |          |          |          |
|----|----------|----------|----------|
| H  | -1.37140 | 0.33594  | 5.19515  |
| H  | -0.41229 | -3.44419 | 3.82244  |
| C  | 0.44089  | -1.69111 | 4.78253  |
| H  | 1.13147  | 0.29848  | 5.31611  |
| H  | -0.13584 | -1.82136 | 5.70817  |
| H  | 1.42183  | -2.15843 | 4.94121  |
| C  | -2.66637 | -1.47273 | -0.11861 |
| H  | -3.40456 | -1.31127 | 0.67773  |
| C  | -2.12420 | -2.91597 | 0.01417  |
| C  | -3.40818 | -1.37581 | -1.49094 |
| H  | -1.57016 | -3.02385 | 0.94294  |
| C  | -1.21544 | -3.29021 | -1.16680 |
| C  | -3.32244 | -3.88707 | 0.05098  |
| H  | -3.77739 | -0.36400 | -1.66206 |
| C  | -2.50916 | -1.77393 | -2.67467 |
| C  | -4.61037 | -2.34283 | -1.44193 |
| H  | -0.80907 | -4.29798 | -1.01635 |
| H  | -0.32016 | -2.63160 | -1.19893 |
| C  | -1.99134 | -3.20743 | -2.48954 |
| H  | -3.96579 | -3.64698 | 0.90752  |
| H  | -2.95445 | -4.91085 | 0.19749  |
| C  | -4.11537 | -3.78953 | -1.26193 |
| H  | -1.66247 | -1.07721 | -2.76861 |
| H  | -3.08903 | -1.69642 | -3.60330 |
| H  | -5.28280 | -2.06690 | -0.61876 |
| H  | -5.18335 | -2.25206 | -2.37389 |
| H  | -1.33110 | -3.47654 | -3.32234 |
| C  | -3.19178 | -4.17389 | -2.43433 |
| H  | -4.97379 | -4.47171 | -1.22874 |
| H  | -3.74451 | -4.13020 | -3.38185 |
| H  | -2.84022 | -5.20670 | -2.31056 |
| Pd | 0.28052  | -0.56115 | -1.37942 |
| C  | 0.90935  | 1.31565  | -1.34907 |
| C  | 0.60342  | 2.12376  | -2.45104 |
| C  | 1.68505  | 1.84151  | -0.30995 |
| C  | 1.05461  | 3.44698  | -2.51066 |
| H  | 0.00581  | 1.73626  | -3.27049 |
| C  | 2.15433  | 3.15771  | -0.36298 |
| H  | 1.93326  | 1.24070  | 0.55510  |
| C  | 1.82063  | 3.93834  | -1.46165 |
| H  | 0.81881  | 4.08712  | -3.35512 |
| H  | 2.76848  | 3.56991  | 0.43141  |
| F  | 2.25926  | 5.22254  | -1.51359 |
| B  | 2.91853  | -1.33738 | -2.62836 |
| O  | 3.78695  | -1.86729 | -3.56955 |
| H  | 3.27369  | -2.06246 | -4.37246 |
| O  | 1.62280  | -1.16852 | -2.83536 |
| C  | 3.62127  | -0.93780 | -1.24216 |
| C  | 3.53237  | -1.73618 | -0.11025 |
| C  | 4.25814  | 0.28480  | -1.08024 |
| C  | 4.04940  | -1.35709 | 1.12265  |
| C  | 4.76312  | 0.71963  | 0.14029  |
| C  | 4.65351  | -0.11070 | 1.25044  |
| F  | 5.10632  | 0.29207  | 2.44685  |
| F  | 2.88709  | -2.92602 | -0.17944 |
| F  | 3.94133  | -2.15440 | 2.20126  |
| F  | 4.33728  | 1.13559  | -2.12591 |
| F  | 5.30464  | 1.94188  | 0.26922  |

3'

E: -2049.02167

|   |          |          |          |
|---|----------|----------|----------|
| O | -0.15228 | -0.77936 | -0.67127 |
| B | 0.70046  | -0.86206 | 0.33329  |
| O | 0.33467  | -1.33775 | 1.59271  |
| H | 1.09038  | -1.38955 | 2.19652  |
| C | 2.22593  | -0.40183 | 0.11240  |
| C | 2.57010  | 0.59340  | -0.80585 |
| C | 3.29426  | -0.96157 | 0.81179  |
| C | 3.88499  | 0.99814  | -1.02130 |
| C | 4.62046  | -0.59258 | 0.62355  |
| C | 4.91523  | 0.39852  | -0.30574 |
| F | 1.62831  | 1.23036  | -1.52226 |

|    |          |          |          |
|----|----------|----------|----------|
| F  | 3.06152  | -1.92460 | 1.74063  |
| F  | 5.60844  | -1.17385 | 1.32150  |
| F  | 4.16956  | 1.96365  | -1.90924 |
| F  | 6.18331  | 0.77768  | -0.50558 |
| Pd | -2.17226 | -1.00348 | -0.27354 |
| C  | -2.27420 | 0.98963  | 0.13330  |
| C  | -1.60082 | 1.49399  | 1.25732  |
| C  | -2.90316 | 1.89652  | -0.73182 |
| C  | -1.54834 | 2.86789  | 1.51077  |
| H  | -1.08827 | 0.81548  | 1.93251  |
| C  | -2.85312 | 3.27642  | -0.49827 |
| H  | -3.43731 | 1.53963  | -1.60886 |
| C  | -2.17618 | 3.73323  | 0.62328  |
| H  | -1.02561 | 3.26690  | 2.37502  |
| H  | -3.33019 | 3.98454  | -1.16911 |
| P  | -4.38289 | -1.02874 | 0.18986  |
| H  | -5.20737 | -0.15089 | -0.53989 |
| H  | -5.11324 | -2.22745 | 0.05358  |
| H  | -4.74666 | -0.67079 | 1.50196  |
| P  | -1.81150 | -3.31457 | -0.76499 |
| H  | -2.81207 | -4.31159 | -0.74906 |
| H  | -1.24624 | -3.59192 | -2.02684 |
| H  | -0.85367 | -3.94756 | 0.05253  |
| F  | -2.12696 | 5.07002  | 0.86348  |

4 (ArPdL-(OH)B(OH)(Ar')OB(OH)Ar')

E: -3779.10910

G: -3778.23148

Esp: -3780.55422

Gcorr: 0.87762

ZPE: 0.95411

Esp + Gcorr: -3779.67661

|   |         |          |          |
|---|---------|----------|----------|
| P | 2.48949 | -0.31855 | 0.09206  |
| C | 3.71216 | 0.94447  | 0.74846  |
| H | 3.09039 | 1.35373  | 1.55448  |
| C | 4.08827 | 2.17423  | -0.12599 |
| C | 5.01850 | 0.41900  | 1.41683  |
| H | 3.21745 | 2.52027  | -0.67529 |
| C | 5.23935 | 1.91553  | -1.11454 |
| C | 4.53876 | 3.27877  | 0.85740  |
| H | 4.82921 | -0.50729 | 1.96655  |
| C | 6.15948 | 0.17306  | 0.40938  |
| C | 5.47609 | 1.51712  | 2.40340  |
| H | 5.44277 | 2.84737  | -1.65903 |
| H | 4.95891 | 1.17172  | -1.86881 |
| C | 6.49636 | 1.46011  | -0.35764 |
| H | 3.72087 | 3.51550  | 1.54822  |
| H | 4.76422 | 4.19643  | 0.29811  |
| C | 5.78652 | 2.81730  | 1.63427  |
| H | 5.89907 | -0.61480 | -0.29797 |
| H | 7.04032 | -0.17803 | 0.96336  |
| H | 4.69442 | 1.69560  | 3.15393  |
| H | 6.37180 | 1.17862  | 2.94110  |
| H | 7.30806 | 1.26153  | -1.06894 |
| C | 6.92873 | 2.55358  | 0.63518  |
| H | 6.08799 | 3.59770  | 2.34437  |
| H | 7.83395 | 2.23717  | 1.17099  |
| H | 7.17646 | 3.47746  | 0.09543  |
| C | 3.37377 | -1.26362 | -1.27844 |
| H | 4.05007 | -0.47210 | -1.61002 |
| C | 2.53160 | -1.62519 | -2.52709 |
| C | 4.26819 | -2.48101 | -0.91503 |
| H | 1.84930 | -0.79617 | -2.75371 |
| C | 1.73783 | -2.92799 | -2.32823 |
| C | 3.51731 | -1.81031 | -3.70013 |
| H | 4.82366 | -2.28546 | 0.00690  |
| C | 3.47183 | -3.78852 | -0.75555 |
| C | 5.26043 | -2.66331 | -2.08733 |
| H | 1.14679 | -3.13329 | -3.23196 |
| H | 1.03463 | -2.82253 | -1.49830 |
| C | 2.69549 | -4.09766 | -2.04573 |
| H | 4.07177 | -0.87807 | -3.87243 |

|    |          |          |          |
|----|----------|----------|----------|
| H  | 2.95917  | -2.03154 | -4.61957 |
| C  | 4.49018  | -2.96388 | -3.38883 |
| H  | 2.78319  | -3.73243 | 0.08929  |
| H  | 4.17666  | -4.60147 | -0.53605 |
| H  | 5.87160  | -1.75982 | -2.21042 |
| H  | 5.94627  | -3.48996 | -1.85974 |
| H  | 2.11661  | -5.02004 | -1.91320 |
| C  | 3.68292  | -4.26356 | -3.21388 |
| H  | 5.20244  | -3.07689 | -4.21565 |
| H  | 4.36051  | -5.10506 | -3.01635 |
| H  | 3.13836  | -4.49472 | -4.13921 |
| C  | 2.28137  | -1.46674 | 1.57526  |
| H  | 3.18483  | -2.08510 | 1.51741  |
| C  | 1.05439  | -2.41771 | 1.51111  |
| C  | 2.29102  | -0.80100 | 2.98024  |
| H  | 0.96432  | -2.85272 | 0.51318  |
| C  | -0.25636 | -1.69091 | 1.84768  |
| C  | 1.27592  | -3.53950 | 2.54709  |
| H  | 3.11201  | -0.08876 | 3.06831  |
| C  | 0.96610  | -0.08420 | 3.28759  |
| C  | 2.51416  | -1.92289 | 4.01734  |
| H  | -1.09212 | -2.39542 | 1.75962  |
| H  | -0.43724 | -0.89675 | 1.12073  |
| C  | -0.19738 | -1.08696 | 3.25545  |
| H  | 2.19745  | -4.09111 | 2.31810  |
| H  | 0.44572  | -4.25575 | 2.49009  |
| C  | 1.35600  | -2.93455 | 3.96166  |
| H  | 0.78382  | 0.70568  | 2.55156  |
| H  | 1.03605  | 0.39718  | 4.27190  |
| H  | 3.47104  | -2.42551 | 3.82220  |
| H  | 2.57923  | -1.48021 | 5.02018  |
| H  | -1.13757 | -0.56630 | 3.47459  |
| C  | 0.03807  | -2.20492 | 4.28645  |
| H  | 1.52816  | -3.73316 | 4.69414  |
| H  | 0.08240  | -1.78405 | 5.30008  |
| H  | -0.80060 | -2.91381 | 4.26578  |
| Pd | 0.46519  | 0.45934  | -0.69925 |
| C  | 0.88730  | 2.36935  | -0.42130 |
| C  | 0.85450  | 3.01118  | 0.82079  |
| C  | 1.01795  | 3.14862  | -1.58293 |
| C  | 0.96004  | 4.40400  | 0.91209  |
| H  | 0.75013  | 2.44074  | 1.73656  |
| C  | 1.13181  | 4.53976  | -1.50733 |
| H  | 1.05095  | 2.67580  | -2.56112 |
| C  | 1.10447  | 5.14062  | -0.25482 |
| H  | 0.93560  | 4.91040  | 1.87212  |
| H  | 1.24071  | 5.14954  | -2.39893 |
| F  | 1.22159  | 6.49106  | -0.17122 |
| O  | -0.76738 | -1.31964 | -1.41692 |
| B  | -1.99250 | -0.46111 | -1.47451 |
| H  | -0.49884 | -1.55174 | -2.32155 |
| O  | -1.50489 | 0.95868  | -1.44302 |
| H  | -1.45667 | 1.31870  | -2.34397 |
| C  | -4.34291 | -1.49386 | 2.19251  |
| C  | -4.28899 | -2.34867 | 1.09748  |
| C  | -3.53857 | -1.97999 | -0.01306 |
| C  | -2.84832 | -0.77393 | -0.11796 |
| C  | -2.92883 | 0.04580  | 1.00466  |
| C  | -3.64942 | -0.29184 | 2.14657  |
| O  | -2.69630 | -0.70464 | -2.72386 |
| F  | -5.04850 | -1.82951 | 3.28131  |
| B  | -3.95281 | -0.34670 | -3.04936 |
| C  | -4.81258 | 0.51646  | -2.01705 |
| C  | -5.73818 | -0.08008 | -1.16880 |
| C  | -4.48365 | 1.83901  | -1.74326 |
| C  | -6.26518 | 0.56722  | -0.05877 |
| C  | -4.99180 | 2.52767  | -0.64904 |
| C  | -5.88458 | 1.88051  | 0.20091  |
| O  | -4.45042 | -0.73910 | -4.25930 |
| H  | -5.35534 | -0.41822 | -4.39523 |
| F  | -6.37220 | 2.51829  | 1.27066  |
| F  | -3.60246 | 2.48297  | -2.53900 |
| F  | -4.62508 | 3.79153  | -0.39661 |
| F  | -6.07587 | -1.37370 | -1.36056 |

|   |          |          |          |
|---|----------|----------|----------|
| F | -7.10022 | -0.06610 | 0.77791  |
| F | -2.26580 | 1.22296  | 1.06885  |
| F | -3.65319 | 0.52299  | 3.21652  |
| F | -3.52902 | -2.85222 | -1.04595 |
| F | -4.95971 | -3.51175 | 1.12302  |

4'

E: -2953.48562  
G: -2953.25025  
Esp: -2954.57168  
Gcorr: 0.23538  
Esp + Gcorr: -2954.33630

|    |          |          |          |
|----|----------|----------|----------|
| Pd | 3.38728  | -0.38006 | 0.02934  |
| C  | 2.51100  | 1.45503  | -0.14332 |
| C  | 2.16980  | 2.13302  | 1.03506  |
| C  | 2.06001  | 1.95548  | -1.37148 |
| C  | 1.34027  | 3.25603  | 0.99777  |
| H  | 2.50286  | 1.76033  | 1.99872  |
| C  | 1.22564  | 3.07706  | -1.42545 |
| H  | 2.30992  | 1.45113  | -2.30021 |
| C  | 0.86908  | 3.69200  | -0.23449 |
| H  | 1.03624  | 3.76861  | 1.90497  |
| H  | 0.82787  | 3.44505  | -2.36572 |
| F  | 0.01085  | 4.74297  | -0.26985 |
| O  | 1.73726  | -0.95423 | 1.34426  |
| B  | 0.49735  | -1.32300 | 0.52714  |
| H  | 1.95046  | -1.71207 | 1.91328  |
| O  | 0.87142  | -1.72467 | -0.81025 |
| H  | 1.06083  | -2.67512 | -0.79421 |
| C  | -2.19261 | 2.26424  | 0.65673  |
| C  | -1.76735 | 1.62983  | 1.81828  |
| C  | -0.91441 | 0.53711  | 1.72169  |
| C  | -0.44890 | 0.01630  | 0.51460  |
| C  | -0.90127 | 0.68543  | -0.61896 |
| C  | -1.75087 | 1.78846  | -0.56873 |
| O  | -0.09992 | -2.45123 | 1.27557  |
| F  | -3.00938 | 3.32677  | 0.72135  |
| B  | -1.34611 | -2.93638 | 1.20940  |
| C  | -2.42579 | -2.25354 | 0.25013  |
| C  | -3.33783 | -1.32684 | 0.74059  |
| C  | -2.35370 | -2.38418 | -1.13142 |
| C  | -4.10753 | -0.52062 | -0.08749 |
| C  | -3.11097 | -1.60293 | -1.99682 |
| C  | -3.98690 | -0.66039 | -1.46694 |
| O  | -1.67435 | -4.01811 | 1.98552  |
| H  | -2.59814 | -4.28125 | 1.85451  |
| F  | -4.70479 | 0.12116  | -2.28248 |
| F  | -1.49839 | -3.27488 | -1.67214 |
| F  | -2.99869 | -1.73602 | -3.32640 |
| F  | -3.42596 | -1.12654 | 2.07409  |
| F  | -4.92373 | 0.41523  | 0.42082  |
| F  | -0.54569 | 0.29329  | -1.85995 |
| F  | -2.14178 | 2.39779  | -1.70323 |
| F  | -0.55736 | -0.04340 | 2.89023  |
| F  | -2.18737 | 2.07635  | 3.01601  |
| P  | 4.32662  | -2.58881 | 0.20526  |
| H  | 5.72156  | -2.79680 | 0.19497  |
| H  | 3.99208  | -3.35792 | 1.34063  |
| H  | 3.95793  | -3.50855 | -0.79878 |
| P  | 5.06814  | 0.59224  | -1.09328 |
| H  | 6.18640  | -0.19706 | -1.42790 |
| H  | 4.75740  | 1.15586  | -2.34369 |
| H  | 5.70132  | 1.67861  | -0.46412 |

TS-5

E: -3779.09536  
G: -3778.21851  
Esp: -3780.53858  
Gcorr: 0.87685  
ZPE: 0.95315



Esp + Gcorr: -3779.66173

|   |         |          |          |
|---|---------|----------|----------|
| P | 2.49897 | -0.19584 | 0.09165  |
| C | 3.18256 | 1.47636  | 0.64146  |
| H | 2.28856 | 1.83611  | 1.15461  |
| C | 3.44280 | 2.50661  | -0.49054 |
| C | 4.32275 | 1.60739  | 1.69241  |
| H | 2.70423 | 2.37916  | -1.28812 |
| C | 4.86654 | 2.41517  | -1.07632 |
| C | 3.27324 | 3.90638  | 0.14018  |
| H | 4.22700 | 0.85168  | 2.47344  |
| C | 5.73517 | 1.52951  | 1.09426  |
| C | 4.14087 | 3.00430  | 2.33295  |
| H | 4.97574 | 3.18938  | -1.84754 |
| H | 5.03999 | 1.45659  | -1.56838 |
| C | 5.91833 | 2.61996  | 0.02626  |
| H | 2.25797 | 4.01671  | 0.53390  |
| H | 3.40907 | 4.67700  | -0.63045 |
| C | 4.31020 | 4.10171  | 1.26406  |
| H | 5.92287 | 0.53899  | 0.66879  |
| H | 6.46732 | 1.66758  | 1.90117  |
| H | 3.14922 | 3.07535  | 2.79920  |
| H | 4.88528 | 3.14122  | 3.12864  |
| H | 6.92326 | 2.54694  | -0.40838 |
| C | 5.72750 | 4.00553  | 0.66953  |
| H | 4.16728 | 5.08688  | 1.72578  |
| H | 6.47846 | 4.16300  | 1.45564  |
| H | 5.87427 | 4.79218  | -0.08280 |
| C | 3.44305 | -0.69870 | -1.45982 |
| H | 3.48439 | 0.29077  | -1.92911 |
| C | 2.65889 | -1.58796 | -2.45421 |
| C | 4.89486 | -1.22988 | -1.35898 |
| H | 1.63283 | -1.21227 | -2.52734 |
| C | 2.68092 | -3.06179 | -2.01957 |
| C | 3.31988 | -1.45745 | -3.84163 |
| H | 5.46297 | -0.63405 | -0.64340 |
| C | 4.93989 | -2.70946 | -0.94626 |
| C | 5.54683 | -1.09967 | -2.75447 |
| H | 2.11871 | -3.66646 | -2.74476 |
| H | 2.18253 | -3.18130 | -1.05377 |
| C | 4.13799 | -3.56129 | -1.94880 |
| H | 3.28714 | -0.41096 | -4.17343 |
| H | 2.74996 | -2.04799 | -4.57103 |
| C | 4.77477 | -1.95217 | -3.77777 |
| H | 4.56277 | -2.83783 | 0.06978  |
| H | 5.98616 | -3.04245 | -0.93627 |
| H | 5.55871 | -0.04995 | -3.07460 |
| H | 6.59158 | -1.43190 | -2.69487 |
| H | 4.14943 | -4.61122 | -1.63106 |
| C | 4.78797 | -3.42959 | -3.33963 |
| H | 5.24261 | -1.85407 | -4.76532 |
| H | 5.82008 | -3.80351 | -3.30789 |
| H | 4.24274 | -4.04129 | -4.07088 |
| C | 2.79986 | -1.22732 | 1.63603  |
| H | 3.88591 | -1.12845 | 1.76544  |
| C | 2.48799 | -2.74730 | 1.67490  |
| C | 2.11339 | -0.57975 | 2.88123  |
| H | 2.89085 | -3.23995 | 0.79153  |
| C | 0.98652 | -3.06014 | 1.77552  |
| C | 3.19584 | -3.31466 | 2.92612  |
| H | 2.23149 | 0.50565  | 2.87058  |
| C | 0.61034 | -0.90733 | 2.94772  |
| C | 2.81055 | -1.14501 | 4.13569  |
| H | 0.85959 | -4.15130 | 1.80522  |
| H | 0.45756 | -2.70445 | 0.89222  |
| C | 0.39453 | -2.42442 | 3.04080  |
| H | 4.27733 | -3.13097 | 2.86652  |
| H | 3.05309 | -4.40281 | 2.95818  |
| C | 2.61450 | -2.67060 | 4.19903  |
| H | 0.09623 | -0.52384 | 2.05904  |
| H | 0.17576 | -0.39880 | 3.81910  |
| H | 3.88041 | -0.89675 | 4.11352  |
| H | 2.38629 | -0.67342 | 5.03207  |

|    |          |          |          |
|----|----------|----------|----------|
| H  | -0.67889 | -2.64136 | 3.09220  |
| C  | 1.10745  | -2.98047 | 4.28645  |
| H  | 3.12862  | -3.07126 | 5.08195  |
| H  | 0.68603  | -2.53314 | 5.19720  |
| H  | 0.95020  | -4.06543 | 4.35540  |
| Pd | 0.23801  | -0.11777 | -0.47305 |
| C  | 0.11459  | 1.83395  | -0.08109 |
| C  | -0.12850 | 2.31751  | 1.21263  |
| C  | 0.05122  | 2.73734  | -1.15289 |
| C  | -0.44821 | 3.66106  | 1.43694  |
| H  | -0.09008 | 1.64803  | 2.06550  |
| C  | -0.26262 | 4.08517  | -0.94689 |
| H  | 0.23708  | 2.39779  | -2.16768 |
| C  | -0.51313 | 4.51973  | 0.34779  |
| H  | -0.64806 | 4.03560  | 2.43623  |
| H  | -0.31655 | 4.78636  | -1.77405 |
| F  | -0.82821 | 5.82503  | 0.55522  |
| O  | -0.24553 | -2.21609 | -1.09115 |
| B  | -1.69431 | -2.09886 | -1.11894 |
| H  | 0.06699  | -2.37357 | -1.99688 |
| O  | -2.20043 | -2.44440 | -2.37418 |
| H  | -3.16248 | -2.53854 | -2.34276 |
| C  | -3.67574 | 2.18241  | -1.14240 |
| C  | -3.46204 | 1.57552  | 0.09058  |
| C  | -2.63277 | 0.46584  | 0.15047  |
| C  | -1.99484 | -0.09623 | -0.95335 |
| C  | -2.22274 | 0.57323  | -2.15723 |
| C  | -3.04579 | 1.68314  | -2.28083 |
| O  | -2.28308 | -2.63620 | 0.04793  |
| F  | -4.46284 | 3.25847  | -1.23168 |
| B  | -3.35405 | -2.62723 | 0.85311  |
| C  | -4.66389 | -1.75540 | 0.56749  |
| C  | -5.18158 | -0.91637 | 1.55537  |
| C  | -5.29265 | -1.67859 | -0.67115 |
| C  | -6.20670 | -0.00780 | 1.32021  |
| C  | -6.32224 | -0.78996 | -0.95275 |
| C  | -6.77619 | 0.05784  | 0.05306  |
| O  | -3.28352 | -3.38382 | 1.99233  |
| H  | -4.07635 | -3.29616 | 2.54295  |
| F  | -7.76289 | 0.92304  | -0.19563 |
| F  | -4.91922 | -2.50919 | -1.67723 |
| F  | -6.88611 | -0.75031 | -2.16648 |
| F  | -4.65057 | -0.93567 | 2.79443  |
| F  | -6.63931 | 0.80678  | 2.28927  |
| F  | -1.57446 | 0.18189  | -3.27931 |
| F  | -3.21821 | 2.30727  | -3.45851 |
| F  | -2.41468 | -0.04383 | 1.39074  |
| F  | -4.04327 | 2.07919  | 1.19416  |

6 (ArAr'PdL-(OH)B(OH)OB(OH)Ar')

E: -3779.12406

G: -3778.24764

Esp: -3780.56386

Gcorr: 0.87642

ZPE: 0.95406

Esp + Gcorr: -3779.68744

|   |         |          |          |
|---|---------|----------|----------|
| P | 2.19695 | -0.36606 | 0.14282  |
| C | 3.50967 | 0.95247  | 0.38242  |
| H | 2.97082 | 1.55398  | 1.12574  |
| C | 3.76308 | 1.92872  | -0.80107 |
| C | 4.88664 | 0.61043  | 1.02010  |
| H | 2.83263 | 2.10618  | -1.33642 |
| C | 4.83833 | 1.46179  | -1.80077 |
| C | 4.25147 | 3.24915  | -0.16385 |
| H | 4.78158 | -0.16081 | 1.78819  |
| C | 5.94204 | 0.14648  | -0.00268 |
| C | 5.38830 | 1.92045  | 1.67101  |
| H | 4.95843 | 2.24276  | -2.56390 |
| H | 4.53170 | 0.55562  | -2.33373 |
| C | 6.17015 | 1.22117  | -1.07578 |
| H | 3.48558 | 3.63708  | 0.51710  |

|                          |          |          |          |   |          |          |          |
|--------------------------|----------|----------|----------|---|----------|----------|----------|
| H                        | 4.40325  | 4.00610  | -0.94479 | O | -1.01148 | -1.44269 | -0.84376 |
| C                        | 5.57581  | 3.00536  | 0.58948  | H | -1.28800 | -2.02450 | -0.11554 |
| H                        | 5.64241  | -0.78699 | -0.48162 | C | -1.85894 | 1.40788  | -0.66543 |
| H                        | 6.87897  | -0.05810 | 0.53291  | C | -2.74018 | 1.55981  | 0.39450  |
| H                        | 4.67127  | 2.25812  | 2.43126  | C | -2.32071 | 1.87479  | -1.88623 |
| H                        | 6.34336  | 1.73993  | 2.18273  | C | -3.99646 | 2.14241  | 0.26878  |
| H                        | 6.92596  | 0.87225  | -1.79101 | C | -3.58207 | 2.42991  | -2.07791 |
| C                        | 6.64213  | 2.52782  | -0.41378 | C | -4.43169 | 2.56032  | -0.98418 |
| H                        | 5.90483  | 3.93878  | 1.06362  | F | -5.65648 | 3.08805  | -1.13181 |
| H                        | 7.59878  | 2.36455  | 0.10102  | F | -2.38844 | 1.14377  | 1.64463  |
| H                        | 6.81159  | 3.29777  | -1.17858 | F | -4.81257 | 2.28159  | 1.33144  |
| C                        | 2.90319  | -1.54705 | -1.14773 | F | -1.51542 | 1.81048  | -2.98847 |
| H                        | 3.49286  | -0.81716 | -1.70738 | F | -3.98909 | 2.84243  | -3.29140 |
| C                        | 1.91565  | -2.13416 | -2.18444 | O | -1.34578 | -0.94366 | -3.14198 |
| C                        | 3.89549  | -2.66491 | -0.72608 | H | -0.80195 | -0.16372 | -2.93479 |
| H                        | 1.16674  | -1.37905 | -2.43890 | O | -2.54510 | -2.71683 | -2.19825 |
| C                        | 1.22588  | -3.41387 | -1.68073 | B | -3.79216 | -2.88446 | -1.67088 |
| C                        | 2.73822  | -2.47963 | -3.44463 | C | -4.29492 | -2.02269 | -0.44212 |
| H                        | 4.55683  | -2.30880 | 0.06855  | C | -5.36768 | -1.13975 | -0.51830 |
| C                        | 3.19639  | -3.95183 | -0.25195 | C | -3.67747 | -2.13149 | 0.79776  |
| C                        | 4.73021  | -3.00737 | -1.98213 | C | -5.81198 | -0.41454 | 0.58270  |
| H                        | 0.53153  | -3.77814 | -2.45042 | C | -4.08243 | -1.42744 | 1.92154  |
| H                        | 0.63260  | -3.20190 | -0.78866 | C | -5.17211 | -0.56869 | 1.80903  |
| C                        | 2.27244  | -4.49189 | -1.35562 | O | -4.63058 | -3.82383 | -2.16848 |
| H                        | 3.21179  | -1.57144 | -3.84078 | H | -4.23798 | -4.28215 | -2.93277 |
| H                        | 2.07194  | -2.86616 | -4.22746 | F | -5.99476 | -0.94688 | -1.69122 |
| C                        | 3.80656  | -3.53521 | -3.09938 | F | -6.82220 | 0.45365  | 0.46479  |
| H                        | 2.62454  | -3.77589 | 0.66144  | F | -5.58107 | 0.12652  | 2.87047  |
| H                        | 3.96464  | -4.69714 | -0.00612 | F | -3.44528 | -1.55198 | 3.09177  |
| H                        | 5.27344  | -2.11849 | -2.32823 | F | -2.60436 | -2.96558 | 0.91744  |
| H                        | 5.48094  | -3.76816 | -1.72976 |   |          |          |          |
| H                        | 1.76680  | -5.39895 | -1.00090 |   |          |          |          |
| C                        | 3.10177  | -4.81426 | -2.61095 |   |          |          |          |
| H                        | 4.40464  | -3.75867 | -3.99171 |   |          |          |          |
| H                        | 3.84378  | -5.59095 | -2.38176 |   |          |          |          |
| H                        | 2.45068  | -5.20971 | -3.40225 |   |          |          |          |
| C                        | 2.23617  | -1.25732 | 1.80327  |   |          |          |          |
| H                        | 3.14852  | -1.86214 | 1.74070  |   |          |          |          |
| C                        | 1.04858  | -2.22551 | 2.04870  |   |          |          |          |
| C                        | 2.38294  | -0.36283 | 3.06587  |   |          |          |          |
| H                        | 0.87143  | -2.83412 | 1.15764  |   |          |          |          |
| C                        | -0.24681 | -1.48201 | 2.41664  |   |          |          |          |
| C                        | 1.42836  | -3.15015 | 3.22470  |   |          |          |          |
| H                        | 3.17532  | 0.37372  | 2.92789  |   |          |          |          |
| C                        | 1.07491  | 0.37019  | 3.40053  |   |          |          |          |
| C                        | 2.76915  | -1.28291 | 4.24309  |   |          |          |          |
| H                        | -1.04537 | -2.21239 | 2.57182  |   |          |          |          |
| H                        | -0.56059 | -0.81349 | 1.60601  |   |          |          |          |
| C                        | -0.04367 | -0.64238 | 3.68337  |   |          |          |          |
| H                        | 2.33613  | -3.71718 | 2.97976  |   |          |          |          |
| H                        | 0.62437  | -3.87938 | 3.39173  |   |          |          |          |
| C                        | 1.65214  | -2.31110 | 4.49737  |   |          |          |          |
| H                        | 0.78473  | 1.00395  | 2.55896  |   |          |          |          |
| H                        | 1.23522  | 1.02520  | 4.26717  |   |          |          |          |
| H                        | 3.71634  | -1.79363 | 4.02320  |   |          |          |          |
| H                        | 2.93025  | -0.67457 | 5.14311  |   |          |          |          |
| H                        | -0.97532 | -0.11471 | 3.92089  |   |          |          |          |
| C                        | 0.35367  | -1.56138 | 4.85189  |   |          |          |          |
| H                        | 1.93839  | -2.97054 | 5.32636  |   |          |          |          |
| H                        | 0.49938  | -0.97023 | 5.76610  |   |          |          |          |
| H                        | -0.45356 | -2.27834 | 5.05390  |   |          |          |          |
| Pd                       | 0.00612  | 0.57862  | -0.38287 |   |          |          |          |
| C                        | 0.50757  | 2.51116  | -0.21965 |   |          |          |          |
| C                        | 0.46692  | 3.19617  | 1.00221  |   |          |          |          |
| C                        | 0.79361  | 3.25441  | -1.37803 |   |          |          |          |
| C                        | 0.74840  | 4.56611  | 1.08371  |   |          |          |          |
| H                        | 0.19435  | 2.67903  | 1.91441  |   |          |          |          |
| C                        | 1.07819  | 4.62106  | -1.31756 |   |          |          |          |
| H                        | 0.80275  | 2.77029  | -2.34870 |   |          |          |          |
| C                        | 1.05560  | 5.25296  | -0.08076 |   |          |          |          |
| H                        | 0.71956  | 5.09207  | 2.03322  |   |          |          |          |
| H                        | 1.31107  | 5.18974  | -2.21267 |   |          |          |          |
| F                        | 1.33277  | 6.58215  | -0.01319 |   |          |          |          |
| B                        | -1.63892 | -1.68771 | -2.05294 |   |          |          |          |
| O                        | -1.01148 | -1.44269 | -0.84376 |   |          |          |          |
| H                        | -1.28800 | -2.02450 | -0.11554 |   |          |          |          |
| C                        | -1.85894 | 1.40788  | -0.66543 |   |          |          |          |
| C                        | -2.74018 | 1.55981  | 0.39450  |   |          |          |          |
| C                        | -2.32071 | 1.87479  | -1.88623 |   |          |          |          |
| C                        | -3.99646 | 2.14241  | 0.26878  |   |          |          |          |
| C                        | -3.58207 | 2.42991  | -2.07791 |   |          |          |          |
| C                        | -4.43169 | 2.56032  | -0.98418 |   |          |          |          |
| F                        | -5.65648 | 3.08805  | -1.13181 |   |          |          |          |
| F                        | -2.38844 | 1.14377  | 1.64463  |   |          |          |          |
| F                        | -4.81257 | 2.28159  | 1.33144  |   |          |          |          |
| F                        | -1.51542 | 1.81048  | -2.98847 |   |          |          |          |
| F                        | -3.98909 | 2.84243  | -3.29140 |   |          |          |          |
| O                        | -1.34578 | -0.94366 | -3.14198 |   |          |          |          |
| H                        | -0.80195 | -0.16372 | -2.93479 |   |          |          |          |
| O                        | -2.54510 | -2.71683 | -2.19825 |   |          |          |          |
| B                        | -3.79216 | -2.88446 | -1.67088 |   |          |          |          |
| C                        | -4.29492 | -2.02269 | -0.44212 |   |          |          |          |
| C                        | -5.36768 | -1.13975 | -0.51830 |   |          |          |          |
| C                        | -3.67747 | -2.13149 | 0.79776  |   |          |          |          |
| C                        | -5.81198 | -0.41454 | 0.58270  |   |          |          |          |
| C                        | -4.08243 | -1.42744 | 1.92154  |   |          |          |          |
| C                        | -5.17211 | -0.56869 | 1.80903  |   |          |          |          |
| O                        | -4.63058 | -3.82383 | -2.16848 |   |          |          |          |
| H                        | -4.23798 | -4.28215 | -2.93277 |   |          |          |          |
| F                        | -5.99476 | -0.94688 | -1.69122 |   |          |          |          |
| F                        | -6.82220 | 0.45365  | 0.46479  |   |          |          |          |
| F                        | -5.58107 | 0.12652  | 2.87047  |   |          |          |          |
| F                        | -3.44528 | -1.55198 | 3.09177  |   |          |          |          |
| F                        | -2.60436 | -2.96558 | 0.91744  |   |          |          |          |
| <b>TS'-A*</b>            |          |          |          |   |          |          |          |
| E: -3186.37019           |          |          |          |   |          |          |          |
| G: -3186.01032           |          |          |          |   |          |          |          |
| Esp: -3187.53719         |          |          |          |   |          |          |          |
| Gcorr: 0.35986           |          |          |          |   |          |          |          |
| Esp + Gcorr: -3187.17733 |          |          |          |   |          |          |          |
| Pd                       | -3.05545 | -2.08426 | -0.18163 |   |          |          |          |
| C                        | -3.56220 | -0.10986 | -0.26467 |   |          |          |          |
| C                        | -3.47323 | 0.51841  | -1.51551 |   |          |          |          |
| C                        | -3.82001 | 0.66989  | 0.86994  |   |          |          |          |
| C                        | -3.58809 | 1.90543  | -1.62868 |   |          |          |          |
| H                        | -3.26693 | -0.06284 | -2.40868 |   |          |          |          |
| C                        | -3.93715 | 2.06101  | 0.77315  |   |          |          |          |
| H                        | -3.89324 | 0.21449  | 1.85273  |   |          |          |          |
| C                        | -3.80354 | 2.65017  | -0.47528 |   |          |          |          |
| H                        | -3.48920 | 2.40749  | -2.58590 |   |          |          |          |
| H                        | -4.09674 | 2.67944  | 1.65028  |   |          |          |          |
| F                        | -3.86293 | 4.00145  | -0.57374 |   |          |          |          |
| O                        | -1.22043 | -1.59780 | -1.25713 |   |          |          |          |
| B                        | -0.09462 | -1.04451 | -0.40994 |   |          |          |          |
| H                        | -0.88407 | -2.33792 | -1.78854 |   |          |          |          |
| O                        | -0.12960 | -1.53596 | 0.94410  |   |          |          |          |
| H                        | 0.09458  | -2.47990 | 0.93934  |   |          |          |          |
| C                        | -0.42452 | 3.42238  | -0.60340 |   |          |          |          |
| C                        | -0.00864 | 2.68306  | -1.70387 |   |          |          |          |
| C                        | 0.07284  | 1.29769  | -1.60010 |   |          |          |          |
| C                        | -0.22375 | 0.58463  | -0.43802 |   |          |          |          |
| C                        | -0.63237 | 1.37128  | 0.63596  |   |          |          |          |
| C                        | -0.73735 | 2.75865  | 0.57526  |   |          |          |          |
| O                        | 1.13437  | -1.52549 | -1.11859 |   |          |          |          |
| F                        | -0.53028 | 4.75383  | -0.68028 |   |          |          |          |
| B                        | 2.40794  | -1.18899 | -0.99713 |   |          |          |          |
| C                        | 2.95525  | -0.23947 | 0.24338  |   |          |          |          |
| C                        | 2.95144  | 1.16603  | -0.05318 |   |          |          |          |
| C                        | 2.46038  | -0.58379 | 1.54508  |   |          |          |          |
| C                        | 2.55500  | 2.12032  | 0.85429  |   |          |          |          |
| C                        | 2.03960  | 0.34941  | 2.46490  |   |          |          |          |
| C                        | 2.08666  | 1.70091  | 2.10651  |   |          |          |          |
| O                        | 3.39075  | -1.57179 | -1.86056 |   |          |          |          |
| H                        | 3.01648  | -2.06884 | -2.60927 |   |          |          |          |

|   |          |          |          |
|---|----------|----------|----------|
| F | 1.66988  | 2.60868  | 2.96581  |
| F | 2.49275  | -1.86377 | 1.89159  |
| F | 1.58175  | 0.00099  | 3.66383  |
| F | 3.36916  | 1.55695  | -1.25150 |
| F | 2.55353  | 3.41909  | 0.55691  |
| F | -0.93590 | 0.82537  | 1.83258  |
| F | -1.15163 | 3.45531  | 1.64515  |
| F | 0.47749  | 0.64310  | -2.71241 |
| F | 0.29859  | 3.30615  | -2.85226 |
| P | -2.39570 | -4.40150 | -0.07031 |
| H | -3.36595 | -5.42361 | -0.04505 |
| H | -1.56264 | -4.90555 | -1.09252 |
| H | -1.63055 | -4.79121 | 1.04918  |
| P | -5.10701 | -2.34259 | 0.69334  |
| H | -5.50046 | -3.64745 | 1.04737  |
| H | -5.38445 | -1.64210 | 1.88011  |
| H | -6.18878 | -1.94955 | -0.11325 |
| C | 6.31099  | -0.47689 | -0.78345 |
| O | 5.52012  | -0.98218 | 0.34265  |
| C | 5.65872  | -2.43675 | 0.43791  |
| C | 6.35689  | -2.86429 | -0.84673 |
| C | 7.21959  | -1.63648 | -1.17586 |
| H | 5.62099  | -0.20463 | -1.58613 |
| H | 6.83989  | 0.41101  | -0.43126 |
| H | 6.25891  | -2.64133 | 1.32988  |
| H | 4.66031  | -2.85916 | 0.57286  |
| H | 6.94477  | -3.77492 | -0.70543 |
| H | 5.62029  | -3.03620 | -1.63642 |
| H | 8.12913  | -1.63151 | -0.56564 |
| H | 7.50782  | -1.58512 | -2.22905 |
| H | 4.13202  | -0.59530 | 0.23976  |

**IM-B\***

E: -2953.88340  
G: -2953.63609  
Esp: -2954.95734  
Gcorr: 0.24731  
Esp + Gcorr: -2954.71003

|    |          |          |          |
|----|----------|----------|----------|
| Pd | -3.19639 | -0.60426 | -0.18598 |
| C  | -2.54580 | 1.32425  | -0.07197 |
| C  | -2.17108 | 1.94533  | -1.27202 |
| C  | -2.28939 | 1.97638  | 1.14089  |
| C  | -1.50278 | 3.17141  | -1.26310 |
| H  | -2.35518 | 1.45760  | -2.22421 |
| C  | -1.62022 | 3.20500  | 1.16637  |
| H  | -2.56687 | 1.52185  | 2.08691  |
| C  | -1.22726 | 3.76825  | -0.03869 |
| H  | -1.17741 | 3.64836  | -2.18219 |
| H  | -1.37801 | 3.70047  | 2.10083  |
| F  | -0.52773 | 4.92980  | -0.02315 |
| O  | -1.41399 | -1.08185 | -1.35563 |
| B  | -0.13070 | -1.28687 | -0.59468 |
| H  | -1.54455 | -1.81080 | -1.98392 |
| O  | -0.34332 | -1.86372 | 0.70702  |
| H  | -0.74480 | -2.74109 | 0.60268  |
| C  | 2.01357  | 2.64366  | -0.38529 |
| C  | 1.90832  | 1.94330  | -1.58088 |
| C  | 1.21998  | 0.73405  | -1.60436 |
| C  | 0.62955  | 0.15326  | -0.48164 |
| C  | 0.76098  | 0.89519  | 0.68930  |
| C  | 1.43222  | 2.11381  | 0.75832  |
| O  | 0.64213  | -2.23366 | -1.47081 |
| F  | 2.65347  | 3.81692  | -0.33961 |
| B  | 1.88698  | -2.64756 | -1.50943 |
| C  | 2.96158  | -2.56623 | -0.17541 |
| C  | 3.77903  | -1.36927 | -0.30901 |
| C  | 2.27465  | -2.70673 | 1.09510  |
| C  | 3.80829  | -0.39269 | 0.65193  |
| C  | 2.30282  | -1.73817 | 2.06695  |
| C  | 3.07009  | -0.58908 | 1.83390  |
| O  | 2.52376  | -3.22233 | -2.55974 |

|   |          |          |          |
|---|----------|----------|----------|
| H | 1.95646  | -3.21510 | -3.35169 |
| F | 3.08164  | 0.35616  | 2.74380  |
| F | 1.61707  | -3.82730 | 1.30733  |
| F | 1.62176  | -1.85293 | 3.19744  |
| F | 4.48494  | -1.21955 | -1.41170 |
| F | 4.49904  | 0.73235  | 0.50079  |
| F | 0.25642  | 0.45150  | 1.86131  |
| F | 1.51055  | 2.77963  | 1.91968  |
| F | 1.15136  | 0.11508  | -2.80499 |
| F | 2.45686  | 2.44294  | -2.69852 |
| P | -3.89289 | -2.91168 | -0.28346 |
| H | -5.23612 | -3.26563 | -0.04582 |
| H | -3.67228 | -3.63261 | -1.47671 |
| H | -3.26344 | -3.79057 | 0.62432  |
| P | -5.03890 | 0.20357  | 0.81008  |
| H | -6.07392 | -0.70843 | 1.09142  |
| H | -4.86384 | 0.81934  | 2.06139  |
| H | -5.74113 | 1.19921  | 0.10985  |
| H | 3.54608  | -3.47169 | -0.39728 |

**TS'-C\***

E: -2953.87639  
G: -2953.63152  
Esp: -2954.95398  
Gcorr: 0.24487  
Esp + Gcorr: -2954.70911

|    |          |          |          |
|----|----------|----------|----------|
| Pd | -3.18498 | -0.77893 | -0.19876 |
| C  | -2.65368 | 1.18661  | -0.15159 |
| C  | -2.25819 | 1.77024  | -1.36339 |
| C  | -2.50487 | 1.91357  | 1.03645  |
| C  | -1.67293 | 3.03801  | -1.38630 |
| H  | -2.36139 | 1.22525  | -2.29660 |
| C  | -1.92359 | 3.18603  | 1.02893  |
| H  | -2.80101 | 1.48843  | 1.99020  |
| C  | -1.50618 | 3.71443  | -0.18377 |
| H  | -1.33181 | 3.48984  | -2.31235 |
| H  | -1.76597 | 3.74316  | 1.94645  |
| F  | -0.89176 | 4.92254  | -0.19615 |
| O  | -1.33616 | -1.21362 | -1.30263 |
| B  | -0.09033 | -1.31918 | -0.48917 |
| H  | -1.45453 | -2.00458 | -1.85456 |
| O  | -0.23064 | -1.98032 | 0.75417  |
| H  | -0.55191 | -2.88705 | 0.62938  |
| C  | 1.75901  | 2.73343  | -0.14828 |
| C  | 1.79948  | 2.03526  | -1.34939 |
| C  | 1.20830  | 0.78031  | -1.42007 |
| C  | 0.58988  | 0.14478  | -0.34459 |
| C  | 0.57751  | 0.88479  | 0.83620  |
| C  | 1.13878  | 2.15382  | 0.94932  |
| O  | 0.81173  | -2.23336 | -1.41855 |
| F  | 2.29744  | 3.95329  | -0.05589 |
| B  | 1.99396  | -2.25951 | -1.85996 |
| C  | 3.47365  | -2.44946 | -0.18431 |
| C  | 4.09548  | -1.19006 | -0.29670 |
| C  | 2.70510  | -2.70427 | 0.96671  |
| C  | 3.89602  | -0.20195 | 0.65621  |
| C  | 2.50535  | -1.73587 | 1.93347  |
| C  | 3.12068  | -0.49256 | 1.77739  |
| O  | 2.86289  | -2.35559 | -2.84447 |
| H  | 2.49236  | -2.14479 | -3.72524 |
| F  | 2.91829  | 0.44864  | 2.69254  |
| F  | 2.12048  | -3.89183 | 1.10914  |
| F  | 1.74476  | -1.96417 | 2.99985  |
| F  | 4.88380  | -0.92826 | -1.33558 |
| F  | 4.43754  | 1.00991  | 0.51895  |
| F  | 0.00990  | 0.39740  | 1.95539  |
| F  | 1.07450  | 2.82126  | 2.10930  |
| F  | 1.26929  | 0.16452  | -2.63220 |
| F  | 2.38613  | 2.58078  | -2.42472 |
| P  | -3.78723 | -3.11965 | -0.21229 |
| H  | -5.14113 | -3.49739 | -0.31205 |

|   |          |          |          |
|---|----------|----------|----------|
| H | -3.24186 | -3.94830 | -1.21697 |
| H | -3.42223 | -3.87596 | 0.92096  |
| P | -5.11432 | -0.02189 | 0.66880  |
| H | -6.11435 | -0.97489 | 0.93985  |
| H | -5.03517 | 0.65868  | 1.89565  |
| H | -5.82531 | 0.90035  | -0.11721 |
| H | 3.85405  | -3.29173 | -0.75793 |

### 7 (PdLArAr')

E: -2698.59829

G: -2697.81972

Esp: -2699.54894

Gcorr: 0.77857

ZPE: 0.84127

Esp + Gcorr: -2698.77037

|   |         |          |          |
|---|---------|----------|----------|
| P | 1.26298 | -0.36762 | 0.14365  |
| C | 2.13460 | 0.82304  | 1.29771  |
| H | 1.56441 | 0.60066  | 2.20737  |
| C | 1.92624 | 2.34505  | 1.07544  |
| C | 3.63006 | 0.57254  | 1.62825  |
| H | 0.89651 | 2.53751  | 0.78702  |
| C | 2.87812 | 2.93939  | 0.02384  |
| C | 2.20502 | 3.03312  | 2.42968  |
| H | 3.82705 | -0.50154 | 1.71980  |
| C | 4.57176 | 1.17817  | 0.56799  |
| C | 3.91358 | 1.26163  | 2.98173  |
| H | 2.68443 | 4.01711  | -0.05726 |
| H | 2.68647 | 2.51560  | -0.96830 |
| C | 4.33830 | 2.69315  | 0.44125  |
| H | 1.50733 | 2.65515  | 3.18920  |
| H | 2.02574 | 4.11235  | 2.33423  |
| C | 3.66122 | 2.77817  | 2.86233  |
| H | 4.42848 | 0.70255  | -0.40382 |
| H | 5.61062 | 0.98223  | 0.86588  |
| H | 3.27232 | 0.83032  | 3.76218  |
| H | 4.95496 | 1.07835  | 3.27895  |
| H | 5.01612 | 3.10478  | -0.31740 |
| C | 4.60736 | 3.36766  | 1.79906  |
| H | 3.84889 | 3.25723  | 3.83168  |
| H | 5.65324 | 3.20955  | 2.09559  |
| H | 4.45249 | 4.45205  | 1.71885  |
| C | 2.13980 | -0.35459 | -1.51508 |
| H | 2.49626 | 0.67973  | -1.51885 |
| C | 1.20153 | -0.47290 | -2.74464 |
| C | 3.38524 | -1.25052 | -1.74905 |
| H | 0.28402 | 0.09149  | -2.55881 |
| C | 0.83143 | -1.92962 | -3.06022 |
| C | 1.95635 | 0.12505  | -3.94944 |
| H | 4.03117 | -1.24035 | -0.86544 |
| C | 3.02010 | -2.70654 | -2.09081 |
| C | 4.14224 | -0.65125 | -2.95629 |
| H | 0.18106 | -1.94945 | -3.94481 |
| H | 0.24989 | -2.35918 | -2.23735 |
| C | 2.10580 | -2.75131 | -3.32793 |
| H | 2.20097 | 1.17770  | -3.75319 |
| H | 1.31351 | 0.10061  | -4.83931 |
| C | 3.24234 | -0.68407 | -4.20867 |
| H | 2.54545 | -3.20423 | -1.24358 |
| H | 3.94678 | -3.25886 | -2.29673 |
| H | 4.44621 | 0.38075  | -2.73590 |
| H | 5.05865 | -1.22795 | -3.13906 |
| H | 1.83685 | -3.79199 | -3.54848 |
| C | 2.85906 | -2.14275 | -4.52654 |
| H | 3.78483 | -0.25095 | -5.05838 |
| H | 3.76142 | -2.73158 | -4.73957 |
| H | 2.22898 | -2.17640 | -5.42545 |
| C | 1.53868 | -2.02284 | 1.00811  |
| H | 2.57891 | -2.30020 | 0.79994  |
| C | 0.61613 | -3.15010 | 0.47476  |
| C | 1.36429 | -1.95873 | 2.55097  |
| H | 0.68422 | -3.21387 | -0.60999 |

|    |          |          |          |
|----|----------|----------|----------|
| C  | -0.85006 | -2.92946 | 0.86733  |
| C  | 1.07158  | -4.49418 | 1.08223  |
| H  | 1.99743  | -1.17546 | 2.97253  |
| C  | -0.10630 | -1.70117 | 2.93029  |
| C  | 1.81562  | -3.30576 | 3.15164  |
| H  | -1.46215 | -3.74954 | 0.47182  |
| H  | -1.29009 | -2.03158 | 0.37329  |
| C  | -0.99390 | -2.83730 | 2.39208  |
| H  | 2.11218  | -4.69700 | 0.79768  |
| H  | 0.45758  | -5.30540 | 0.67003  |
| C  | 0.93671  | -4.44621 | 2.61386  |
| H  | -0.45125 | -0.73898 | 2.52766  |
| H  | -0.19613 | -1.64429 | 4.02267  |
| H  | 2.86970  | -3.48910 | 2.90426  |
| H  | 1.74311  | -3.25451 | 4.24604  |
| H  | -2.04063 | -2.64590 | 2.65435  |
| C  | -0.53283 | -4.18018 | 2.99618  |
| H  | 1.26279  | -5.40127 | 3.04393  |
| H  | -0.63752 | -4.15066 | 4.08856  |
| H  | -1.17144 | -4.99500 | 2.63042  |
| Pd | -1.08479 | -0.10742 | -0.02412 |
| C  | -1.14190 | 1.87295  | -0.25595 |
| C  | -1.65100 | 2.64659  | 0.79998  |
| C  | -0.62967 | 2.52666  | -1.38359 |
| C  | -1.58952 | 4.04282  | 0.76209  |
| H  | -2.08206 | 2.16624  | 1.67215  |
| C  | -0.57162 | 3.92393  | -1.43911 |
| H  | -0.24259 | 1.96200  | -2.22378 |
| C  | -1.04063 | 4.65554  | -0.35702 |
| H  | -1.96400 | 4.64764  | 1.58231  |
| H  | -0.16094 | 4.43717  | -2.30328 |
| F  | -0.97046 | 6.01193  | -0.39795 |
| C  | -3.13528 | -0.05907 | -0.17044 |
| C  | -3.94969 | -0.04869 | 0.95137  |
| C  | -3.79652 | -0.04617 | -1.38871 |
| C  | -5.33942 | -0.03157 | 0.89199  |
| C  | -5.18268 | -0.02801 | -1.50895 |
| C  | -5.95910 | -0.02108 | -0.35407 |
| F  | -7.29974 | -0.00895 | -0.44149 |
| F  | -3.39163 | -0.04738 | 2.19695  |
| F  | -6.09164 | -0.02593 | 2.00884  |
| F  | -3.08285 | -0.04812 | -2.54918 |
| F  | -5.78422 | -0.02003 | -2.71350 |

### 8 (B(OH)<sub>2</sub>OB(OH)Ar')

E: -1080.49120

G: -1080.42100

Esp: -1081.00378

Gcorr: 0.07020

ZPE: 0.10899

Esp + Gcorr: -1080.93358

|   |          |          |          |
|---|----------|----------|----------|
| B | 3.06137  | -0.35360 | -0.49070 |
| O | 2.67116  | 0.70756  | 0.29582  |
| B | 1.47597  | 1.34843  | 0.42852  |
| O | 4.12300  | -1.13220 | -0.11886 |
| H | 4.47139  | -0.86097 | 0.74506  |
| O | 2.42360  | -0.57675 | -1.67909 |
| H | 2.79987  | -1.34504 | -2.13685 |
| O | 1.53129  | 2.67083  | 0.74195  |
| H | 0.65154  | 3.07185  | 0.81369  |
| C | 0.09348  | 0.58796  | 0.27033  |
| C | -0.03319 | -0.79392 | 0.43436  |
| C | -1.08805 | 1.26462  | -0.04073 |
| C | -1.23883 | -1.46759 | 0.28072  |
| C | -2.31235 | 0.63061  | -0.20836 |
| C | -2.38462 | -0.74878 | -0.04468 |
| F | 1.03547  | -1.54388 | 0.76827  |
| F | -1.07432 | 2.60926  | -0.19655 |
| F | -3.41348 | 1.32744  | -0.51482 |
| F | -1.31001 | -2.79388 | 0.45030  |
| F | -3.55104 | -1.38038 | -0.19381 |

**TS-9**

E: -2698.57222  
 G: -2697.79436  
 Esp: -2699.51927  
 Gcorr: 0.77787  
 ZPE: 0.84011  
 Esp + Gcorr: -2698.74140

|   |          |          |          |
|---|----------|----------|----------|
| P | -1.29923 | -0.36386 | -0.12849 |
| C | -2.08175 | 1.11088  | -0.98018 |
| H | -1.60001 | 1.01058  | -1.95984 |
| C | -1.63405 | 2.50535  | -0.46844 |
| C | -3.61114 | 1.13717  | -1.23151 |
| H | -0.57096 | 2.47984  | -0.23050 |
| C | -2.42890 | 2.98023  | 0.76028  |
| C | -1.87922 | 3.50603  | -1.61801 |
| H | -3.96547 | 0.14339  | -1.52857 |
| C | -4.40102 | 1.61343  | 0.00350  |
| C | -3.85996 | 2.13826  | -2.38227 |
| H | -2.08312 | 3.98542  | 1.03659  |
| H | -2.23678 | 2.33990  | 1.62813  |
| C | -3.93226 | 3.01681  | 0.43023  |
| H | -1.28864 | 3.21529  | -2.49706 |
| H | -1.53791 | 4.50533  | -1.31599 |
| C | -3.38016 | 3.54445  | -1.96765 |
| H | -4.29653 | 0.91057  | 0.83299  |
| H | -5.46949 | 1.64162  | -0.24993 |
| H | -3.33063 | 1.80821  | -3.28637 |
| H | -4.93089 | 2.16654  | -2.62526 |
| H | -4.49838 | 3.33865  | 1.31370  |
| C | -4.17200 | 4.00367  | -0.72804 |
| H | -3.54886 | 4.24618  | -2.79454 |
| H | -5.24396 | 4.05383  | -0.96309 |
| H | -3.85592 | 5.01359  | -0.43373 |
| C | -2.14487 | -0.56008 | 1.54201  |
| H | -2.48406 | 0.46364  | 1.70912  |
| C | -1.15439 | -0.85898 | 2.69473  |
| C | -3.39082 | -1.46671 | 1.69682  |
| H | -0.25009 | -0.25453 | 2.55403  |
| C | -0.77740 | -2.34738 | 2.73239  |
| C | -1.84270 | -0.47192 | 4.01843  |
| H | -4.08272 | -1.30002 | 0.86307  |
| C | -3.02484 | -2.96021 | 1.77537  |
| C | -4.07827 | -1.07397 | 3.02476  |
| H | -0.06809 | -2.52564 | 3.55179  |
| H | -0.26437 | -2.62721 | 1.80397  |
| C | -2.04249 | -3.20377 | 2.93566  |
| H | -2.09165 | 0.59798  | 4.01041  |
| H | -1.15516 | -0.63936 | 4.85855  |
| C | -3.11743 | -1.31542 | 4.20695  |
| H | -2.59680 | -3.31189 | 0.83591  |
| H | -3.94224 | -3.54152 | 1.93978  |
| H | -4.38089 | -0.01873 | 2.99547  |
| H | -4.99146 | -1.66981 | 3.15669  |
| H | -1.76857 | -4.26604 | 2.96617  |
| C | -2.72489 | -2.80473 | 4.25807  |
| H | -3.61350 | -1.03136 | 5.14374  |
| H | -3.61675 | -3.42513 | 4.42021  |
| H | -2.04675 | -2.98345 | 5.10349  |
| C | -1.78875 | -1.79921 | -1.24863 |
| H | -2.81331 | -2.07075 | -0.96779 |
| C | -0.88672 | -3.05366 | -1.05943 |
| C | -1.80283 | -1.45701 | -2.76390 |
| H | -0.80887 | -3.30579 | 0.00023  |
| C | 0.53046  | -2.84184 | -1.61856 |
| C | -1.53622 | -4.23264 | -1.81293 |
| H | -2.41186 | -0.56923 | -2.94688 |
| C | -0.37611 | -1.22593 | -3.29839 |
| C | -2.44552 | -2.63840 | -3.51946 |
| H | 1.12109  | -3.75326 | -1.45652 |
| H | 1.05294  | -2.03389 | -1.07600 |

|    |          |          |          |
|----|----------|----------|----------|
| C  | 0.46631  | -2.50125 | -3.11442 |
| H  | -2.54272 | -4.42233 | -1.41631 |
| H  | -0.94515 | -5.14339 | -1.64814 |
| C  | -1.61018 | -3.91325 | -3.31742 |
| H  | 0.10395  | -0.39021 | -2.77183 |
| H  | -0.42624 | -0.95601 | -4.36163 |
| H  | -3.47176 | -2.79377 | -3.16032 |
| H  | -2.50917 | -2.39493 | -4.58866 |
| H  | 1.47988  | -2.33213 | -3.49893 |
| C  | -0.19043 | -3.67472 | -3.86716 |
| H  | -2.07754 | -4.75117 | -3.85010 |
| H  | -0.23769 | -3.45404 | -4.94218 |
| H  | 0.41745  | -4.58179 | -3.74848 |
| Pd | 1.05397  | -0.09209 | 0.04401  |
| C  | 1.91586  | 1.78812  | 0.13667  |
| C  | 1.97260  | 2.49696  | -1.08193 |
| C  | 1.70188  | 2.51471  | 1.32685  |
| C  | 1.75391  | 3.87371  | -1.12010 |
| H  | 2.16860  | 1.97319  | -2.00771 |
| C  | 1.47927  | 3.89100  | 1.29296  |
| H  | 1.68467  | 2.00497  | 2.28069  |
| C  | 1.49487  | 4.54585  | 0.06733  |
| H  | 1.76986  | 4.41864  | -2.05856 |
| H  | 1.28430  | 4.44992  | 2.20286  |
| F  | 1.25449  | 5.88017  | 0.02974  |
| C  | 3.07411  | 0.23805  | 0.23845  |
| C  | 3.89388  | -0.03580 | -0.86729 |
| C  | 3.66695  | -0.01630 | 1.48452  |
| C  | 5.20390  | -0.47866 | -0.75699 |
| C  | 4.97456  | -0.45732 | 1.63345  |
| C  | 5.75602  | -0.68264 | 0.50451  |
| F  | 7.01785  | -1.11575 | 0.62941  |
| F  | 3.40959  | 0.10902  | -2.12546 |
| F  | 5.93804  | -0.73478 | -1.85251 |
| F  | 2.95518  | 0.15782  | 2.62459  |
| F  | 5.48738  | -0.68794 | 2.85342  |

**10 (ArAr')**

E: -1058.71003  
 G: -1058.61477  
 Esp: -1059.18225  
 Gcorr: 0.09526  
 ZPE: 0.13282  
 Esp + Gcorr: -1059.08699

|   |          |          |          |
|---|----------|----------|----------|
| C | 2.00618  | -0.93907 | -0.76257 |
| C | 3.39883  | -0.94423 | -0.76701 |
| C | 4.06986  | -0.00002 | 0.00000  |
| C | 3.39888  | 0.94423  | 0.76701  |
| C | 2.00622  | 0.93910  | 0.76260  |
| C | 1.29273  | 0.00002  | 0.00003  |
| H | 1.47218  | -1.66614 | -1.36393 |
| H | 3.96013  | -1.66207 | -1.35556 |
| H | 3.96020  | 1.66207  | 1.35553  |
| H | 1.47226  | 1.66618  | 1.36398  |
| C | -0.18942 | 0.00002  | 0.00005  |
| C | -0.92995 | -1.18156 | 0.12835  |
| C | -0.92997 | 1.18158  | -0.12829 |
| C | -2.31995 | -1.19417 | 0.12743  |
| C | -2.31998 | 1.19416  | -0.12740 |
| C | -3.02022 | -0.00001 | 0.00001  |
| F | -0.30334 | 2.36187  | -0.27486 |
| F | -2.98699 | 2.34849  | -0.26036 |
| F | -4.35744 | -0.00003 | -0.00003 |
| F | -2.98695 | -2.34852 | 0.26031  |
| F | -0.30329 | -2.36185 | 0.27485  |
| F | 5.42202  | -0.00000 | -0.00006 |

**11\* (ArPdL<sup>+</sup>-O(B(OH)<sub>2</sub>)-B(OH)Ar')**

E: -3051.16895  
 G: -3050.33178

Esp: -3052.2821  
Gcorr: 0.83716  
ZPE: 0.90373  
Esp + Gcorr: -3051.44492

|   |          |          |          |
|---|----------|----------|----------|
| P | 1.39516  | -0.29597 | -0.08680 |
| C | 2.74446  | 0.98606  | -0.29218 |
| H | 2.97590  | 1.12406  | 0.76963  |
| C | 2.40407  | 2.40875  | -0.80191 |
| C | 4.05457  | 0.51443  | -0.98687 |
| H | 1.46394  | 2.73885  | -0.37145 |
| C | 2.33362  | 2.49447  | -2.33441 |
| C | 3.53089  | 3.33685  | -0.29681 |
| H | 4.28573  | -0.51972 | -0.70903 |
| C | 3.97934  | 0.63242  | -2.52282 |
| C | 5.18175  | 1.44363  | -0.48383 |
| H | 2.08328  | 3.52398  | -2.62097 |
| H | 1.53035  | 1.85568  | -2.72098 |
| C | 3.68489  | 2.08056  | -2.94188 |
| H | 3.56630  | 3.31475  | 0.80100  |
| H | 3.30775  | 4.37005  | -0.59334 |
| C | 4.88266  | 2.90080  | -0.88866 |
| H | 3.20970  | -0.02070 | -2.93484 |
| H | 4.93702  | 0.30114  | -2.94506 |
| H | 5.27484  | 1.36217  | 0.60736  |
| H | 6.13814  | 1.12275  | -0.91672 |
| H | 3.63309  | 2.13917  | -4.03614 |
| C | 4.80331  | 3.00231  | -2.42340 |
| H | 5.67987  | 3.55433  | -0.51350 |
| H | 5.76306  | 2.71227  | -2.87142 |
| H | 4.60634  | 4.04111  | -2.71990 |
| C | 0.89031  | -1.01636 | -1.73573 |
| H | 0.98733  | -0.11024 | -2.34414 |
| C | -0.58617 | -1.47873 | -1.89768 |
| C | 1.81471  | -2.08643 | -2.38481 |
| H | -1.25714 | -0.80280 | -1.35672 |
| C | -0.84005 | -2.91447 | -1.41220 |
| C | -0.89000 | -1.42858 | -3.41112 |
| H | 2.86520  | -1.84361 | -2.20859 |
| C | 1.54312  | -3.51222 | -1.87174 |
| C | 1.51474  | -2.04349 | -3.90122 |
| H | -1.87541 | -3.18102 | -1.63734 |
| H | -0.72845 | -2.99067 | -0.32754 |
| C | 0.08334  | -3.90379 | -2.13560 |
| H | -0.74842 | -0.40727 | -3.78963 |
| H | -1.94053 | -1.69784 | -3.58225 |
| C | 0.03886  | -2.40998 | -4.15749 |
| H | 1.76740  | -3.60093 | -0.80535 |
| H | 2.21978  | -4.20080 | -2.39406 |
| H | 1.73422  | -1.04455 | -4.29927 |
| H | 2.16955  | -2.75282 | -4.42330 |
| H | -0.10134 | -4.91836 | -1.76229 |
| C | -0.21213 | -3.84096 | -3.64545 |
| H | -0.16693 | -2.35930 | -5.23345 |
| H | 0.42877  | -4.54970 | -4.18607 |
| H | -1.25362 | -4.13239 | -3.83503 |
| C | 2.24409  | -1.60340 | 0.97026  |
| H | 2.85097  | -2.16182 | 0.24829  |
| C | 1.25327  | -2.58296 | 1.64517  |
| C | 3.20193  | -1.05478 | 2.06147  |
| H | 0.54458  | -2.96373 | 0.91150  |
| C | 0.48861  | -1.91263 | 2.79458  |
| C | 2.05223  | -3.76688 | 2.22985  |
| H | 3.91995  | -0.35764 | 1.62582  |
| C | 2.41532  | -0.36538 | 3.19084  |
| C | 3.99494  | -2.24596 | 2.63998  |
| H | -0.21916 | -2.62506 | 3.23385  |
| H | -0.17203 | -1.08393 | 2.44310  |
| C | 1.45727  | -1.37095 | 3.85145  |
| H | 2.59112  | -4.28197 | 1.42465  |
| H | 1.35462  | -4.49037 | 2.67038  |
| C | 3.03809  | -3.25512 | 3.29367  |
| H | 1.84431  | 0.48877  | 2.80181  |

|    |          |          |          |
|----|----------|----------|----------|
| H  | 3.11830  | 0.02873  | 3.93540  |
| H  | 4.57240  | -2.73001 | 1.84150  |
| H  | 4.71380  | -1.87028 | 3.37930  |
| H  | 0.89116  | -0.87599 | 4.64643  |
| C  | 2.25920  | -2.55745 | 4.42497  |
| H  | 3.60970  | -4.09695 | 3.70229  |
| H  | 2.95429  | -2.19631 | 5.19375  |
| H  | 1.57865  | -3.26923 | 4.90987  |
| Pd | -0.38534 | 0.38588  | 1.13591  |
| C  | -0.72345 | 2.00178  | 0.01959  |
| C  | -0.65171 | 3.21254  | 0.72701  |
| C  | -1.12837 | 2.01341  | -1.31803 |
| C  | -0.99283 | 4.41887  | 0.11235  |
| H  | -0.29847 | 3.23833  | 1.75388  |
| C  | -1.47162 | 3.21593  | -1.94437 |
| H  | -1.18644 | 1.10076  | -1.89558 |
| C  | -1.39680 | 4.39530  | -1.21723 |
| H  | -0.93866 | 5.36076  | 0.64865  |
| H  | -1.79171 | 3.23760  | -2.98108 |
| F  | -1.72382 | 5.56114  | -1.82185 |
| B  | -3.24391 | 1.27223  | 1.68774  |
| O  | -3.93868 | 2.43029  | 1.84221  |
| H  | -4.68578 | 2.53746  | 1.22980  |
| O  | -2.14150 | 1.06380  | 2.49839  |
| C  | -3.59944 | 0.16657  | 0.63975  |
| C  | -3.41085 | -1.19352 | 0.89453  |
| C  | -4.06366 | 0.50228  | -0.63188 |
| C  | -3.67948 | -2.17097 | -0.05248 |
| C  | -4.28707 | -0.44324 | -1.62335 |
| C  | -4.10389 | -1.78912 | -1.32188 |
| F  | -4.29410 | -2.71321 | -2.26517 |
| F  | -2.95003 | -1.60391 | 2.09132  |
| F  | -3.49316 | -3.46547 | 0.22920  |
| F  | -4.27123 | 1.79740  | -0.93973 |
| F  | -4.66179 | -0.07924 | -2.85395 |
| B  | -1.75235 | 1.81440  | 3.62566  |
| O  | -2.46050 | 2.86480  | 4.10449  |
| H  | -3.21664 | 3.08558  | 3.53131  |
| O  | -0.58952 | 1.39775  | 4.19462  |
| H  | -0.33451 | 1.95285  | 4.94987  |

11<sup>+</sup>•BF<sub>4</sub><sup>-</sup>

E: -2650.16579

|    |          |          |          |
|----|----------|----------|----------|
| B  | -1.44727 | -1.33994 | -0.81034 |
| O  | -0.83686 | -0.50008 | 0.14020  |
| B  | 0.13845  | -0.83659 | 1.07277  |
| O  | -2.07733 | -0.76275 | -1.87575 |
| H  | -2.08888 | 0.20724  | -1.82608 |
| O  | -1.31713 | -2.67958 | -0.65963 |
| H  | -2.13736 | -3.10413 | -0.98617 |
| O  | -0.20410 | -0.65654 | 2.36913  |
| H  | 0.52899  | -0.84068 | 2.97866  |
| C  | 1.58426  | -1.24603 | 0.60942  |
| C  | 1.94979  | -1.35372 | -0.73623 |
| C  | 2.63932  | -1.35939 | 1.52142  |
| C  | 3.26381  | -1.53353 | -1.15261 |
| C  | 3.96192  | -1.54329 | 1.14789  |
| C  | 4.27637  | -1.62394 | -0.20575 |
| F  | 1.03329  | -1.24459 | -1.71289 |
| F  | 2.40143  | -1.25176 | 2.85186  |
| F  | 4.93132  | -1.62490 | 2.06640  |
| F  | 3.56215  | -1.57980 | -2.45603 |
| F  | 5.54280  | -1.78049 | -0.58976 |
| Pd | -1.33648 | 1.68712  | 0.12892  |
| C  | 0.64570  | 1.99813  | -0.22091 |
| C  | 1.50916  | 2.13821  | 0.87297  |
| C  | 1.17437  | 1.80852  | -1.50290 |
| C  | 2.89163  | 2.00647  | 0.70570  |
| H  | 1.11379  | 2.31367  | 1.86976  |
| C  | 2.55380  | 1.67789  | -1.68450 |
| H  | 0.51922  | 1.71885  | -2.36456 |

|   |          |          |          |
|---|----------|----------|----------|
| C | 3.38040  | 1.75777  | -0.56962 |
| H | 3.57591  | 2.07600  | 1.54514  |
| H | 2.98309  | 1.48399  | -2.66217 |
| P | -1.38421 | 3.90741  | -0.11748 |
| H | -0.94164 | 4.40391  | -1.35436 |
| H | -2.63890 | 4.53204  | 0.00985  |
| H | -0.60272 | 4.64742  | 0.78506  |
| P | -3.67249 | 1.37426  | 0.68419  |
| H | -4.37427 | 2.58509  | 0.85976  |
| H | -4.55909 | 0.68476  | -0.15868 |
| H | -3.94641 | 0.75572  | 1.91573  |
| F | 4.71175  | 1.56475  | -0.73237 |
| B | -4.57070 | -2.28811 | -0.08755 |
| F | -3.93821 | -3.15393 | -1.02348 |
| F | -3.56622 | -1.56703 | 0.61635  |
| F | -5.31255 | -3.04340 | 0.81498  |
| F | -5.38856 | -1.37934 | -0.77037 |

**12 (ArPdL<sup>+</sup>-O(B(OH)F)-B(OH)Ar')**

E: -3151.18526

G: -3150.34802

Esp: -3152.35699

Gcorr: 0.83724

ZPE: 0.90482

Esp + Gcorr: -3151.51975

|   |          |          |          |
|---|----------|----------|----------|
| P | 2.03075  | -0.19652 | 0.06054  |
| C | 3.06432  | 1.32622  | -0.30874 |
| H | 2.96163  | 1.81903  | 0.66600  |
| C | 2.55344  | 2.37365  | -1.33814 |
| C | 4.59203  | 1.13016  | -0.55016 |
| H | 1.47595  | 2.47818  | -1.25983 |
| C | 2.92292  | 2.05232  | -2.79690 |
| C | 3.22060  | 3.71417  | -0.95412 |
| H | 4.98562  | 0.32828  | 0.08107  |
| C | 4.94191  | 0.82119  | -2.01985 |
| C | 5.26902  | 2.46603  | -0.16746 |
| H | 2.53760  | 2.85774  | -3.43642 |
| H | 2.43850  | 1.12940  | -3.13580 |
| C | 4.44801  | 1.94193  | -2.94565 |
| H | 2.93769  | 3.98944  | 0.06909  |
| H | 2.85065  | 4.50890  | -1.61541 |
| C | 4.75140  | 3.59700  | -1.07940 |
| H | 4.51196  | -0.12816 | -2.33895 |
| H | 6.03225  | 0.71679  | -2.10033 |
| H | 5.06424  | 2.70197  | 0.88537  |
| H | 6.35790  | 2.37019  | -0.27313 |
| H | 4.70487  | 1.69941  | -3.98461 |
| C | 5.10822  | 3.27231  | -2.54194 |
| H | 5.21945  | 4.54498  | -0.78531 |
| H | 6.19814  | 3.20017  | -2.65822 |
| H | 4.76361  | 4.08071  | -3.20073 |
| C | 2.16013  | -1.31178 | -1.45306 |
| H | 2.28756  | -0.53550 | -2.21253 |
| C | 0.87738  | -2.07698 | -1.86255 |
| C | 3.37423  | -2.27136 | -1.59635 |
| H | 0.00074  | -1.44064 | -1.69897 |
| C | 0.72222  | -3.39421 | -1.08341 |
| C | 1.00273  | -2.39880 | -3.36667 |
| H | 4.28822  | -1.78791 | -1.24010 |
| C | 3.18765  | -3.60222 | -0.84454 |
| C | 3.50750  | -2.58728 | -3.10475 |
| H | -0.21454 | -3.88523 | -1.37987 |
| H | 0.67368  | -3.19731 | -0.00798 |
| C | 1.92240  | -4.31952 | -1.34100 |
| H | 1.08677  | -1.46579 | -3.93969 |
| H | 0.09437  | -2.91062 | -3.71055 |
| C | 2.23340  | -3.29315 | -3.61134 |
| H | 3.12341  | -3.44177 | 0.23402  |
| H | 4.07170  | -4.22920 | -1.02045 |
| H | 3.67734  | -1.66294 | -3.67169 |
| H | 4.38115  | -3.23222 | -3.26726 |

|    |          |          |          |
|----|----------|----------|----------|
| H  | 1.78852  | -5.25605 | -0.78578 |
| C  | 2.04722  | -4.61556 | -2.84507 |
| H  | 2.33252  | -3.49670 | -4.68483 |
| H  | 2.90145  | -5.28168 | -3.02615 |
| H  | 1.14803  | -5.13413 | -3.20356 |
| C  | 2.99465  | -0.99180 | 1.47349  |
| H  | 3.80421  | -1.50902 | 0.94528  |
| C  | 2.20835  | -2.05667 | 2.28810  |
| C  | 3.67382  | -0.02726 | 2.48497  |
| H  | 1.66370  | -2.72153 | 1.61336  |
| C  | 1.21301  | -1.42201 | 3.27641  |
| C  | 3.23669  | -2.88139 | 3.09116  |
| H  | 4.20847  | 0.76821  | 1.96539  |
| C  | 2.65472  | 0.59712  | 3.45176  |
| C  | 4.70268  | -0.85192 | 3.28787  |
| H  | 0.68849  | -2.22305 | 3.81301  |
| H  | 0.44772  | -0.85036 | 2.74049  |
| C  | 1.95026  | -0.50422 | 4.26082  |
| H  | 3.94606  | -3.36868 | 2.40911  |
| H  | 2.71583  | -3.67651 | 3.64059  |
| C  | 3.98995  | -1.96541 | 4.07417  |
| H  | 1.90973  | 1.17300  | 2.89174  |
| H  | 3.17262  | 1.29655  | 4.12114  |
| H  | 5.44868  | -1.28117 | 2.60557  |
| H  | 5.23902  | -0.18762 | 3.97851  |
| H  | 1.22898  | -0.05042 | 4.95191  |
| C  | 2.98773  | -1.32239 | 5.05144  |
| H  | 4.72842  | -2.55386 | 4.63311  |
| H  | 3.52015  | -0.67532 | 5.76179  |
| H  | 2.48069  | -2.10031 | 5.63772  |
| Pd | -0.19034 | 0.09885  | 0.60342  |
| C  | -0.18571 | 2.05144  | 0.30686  |
| C  | 0.31798  | 2.98707  | 1.21760  |
| C  | -0.92441 | 2.51116  | -0.79738 |
| C  | 0.10874  | 4.35804  | 1.02794  |
| H  | 0.88651  | 2.66605  | 2.08348  |
| C  | -1.13740 | 3.87733  | -1.00195 |
| H  | -1.32254 | 1.80641  | -1.52219 |
| C  | -0.60891 | 4.77635  | -0.08389 |
| H  | 0.49909  | 5.09134  | 1.72698  |
| H  | -1.69959 | 4.24193  | -1.85616 |
| F  | -0.80315 | 6.10599  | -0.27973 |
| O  | -1.19624 | -1.90110 | 1.00532  |
| B  | -2.51706 | -1.29220 | 0.71434  |
| H  | -1.02778 | -2.61303 | 0.37114  |
| O  | -2.28551 | 0.12637  | 1.12455  |
| H  | -2.78734 | 0.77061  | 0.60095  |
| O  | -2.78098 | -1.42700 | -0.71652 |
| B  | -3.90697 | -1.23126 | -1.41300 |
| C  | -5.19448 | -0.53088 | -0.77647 |
| C  | -6.37211 | -1.23481 | -0.54753 |
| C  | -5.19931 | 0.80476  | -0.39748 |
| C  | -7.49367 | -0.65327 | 0.03402  |
| C  | -6.29313 | 1.43091  | 0.18516  |
| C  | -7.45155 | 0.68930  | 0.39866  |
| O  | -3.93275 | -1.62850 | -2.72460 |
| H  | -4.77818 | -1.42174 | -3.15168 |
| F  | -8.52181 | 1.26567  | 0.95567  |
| F  | -4.07669 | 1.55469  | -0.58405 |
| F  | -6.24830 | 2.72278  | 0.53453  |
| F  | -6.44342 | -2.53725 | -0.88794 |
| F  | -8.60890 | -1.36524 | 0.24394  |
| F  | -3.54033 | -1.86380 | 1.47221  |

**12'**

E: -2325.56232

|   |          |          |          |
|---|----------|----------|----------|
| B | 0.58224  | -1.70949 | 1.65384  |
| O | 0.57222  | -1.31521 | 0.13096  |
| B | -0.40320 | -1.19486 | -0.79183 |
| O | 1.23004  | -0.63432 | 2.35374  |
| H | 0.65779  | 0.14526  | 2.30328  |

|    |          |          |          |
|----|----------|----------|----------|
| O  | -0.73936 | -1.98832 | 2.11683  |
| H  | -1.08141 | -2.77867 | 1.67408  |
| O  | -0.05395 | -1.37884 | -2.10930 |
| H  | -0.80839 | -1.27270 | -2.70868 |
| C  | -1.90367 | -0.82727 | -0.42282 |
| C  | -2.22706 | 0.09324  | 0.57585  |
| C  | -2.98451 | -1.38752 | -1.10154 |
| C  | -3.53770 | 0.42573  | 0.89489  |
| C  | -4.31020 | -1.09193 | -0.80596 |
| C  | -4.58475 | -0.17630 | 0.20331  |
| F  | -1.26412 | 0.73776  | 1.25683  |
| F  | -2.76015 | -2.27082 | -2.10245 |
| F  | -5.31454 | -1.66927 | -1.48128 |
| F  | -3.80484 | 1.32216  | 1.85536  |
| F  | -5.85057 | 0.13378  | 0.50171  |
| Pd | 2.46787  | -0.18601 | -0.19044 |
| C  | 1.41363  | 1.55953  | -0.28614 |
| C  | 0.59637  | 1.83041  | -1.39173 |
| C  | 1.36596  | 2.41852  | 0.82038  |
| C  | -0.29977 | 2.90436  | -1.37352 |
| H  | 0.62606  | 1.18818  | -2.26620 |
| C  | 0.47821  | 3.49841  | 0.85269  |
| H  | 2.00795  | 2.24372  | 1.67945  |
| C  | -0.34462 | 3.71276  | -0.24507 |
| H  | -0.95203 | 3.11429  | -2.21571 |
| H  | 0.41989  | 4.16095  | 1.71074  |
| P  | 4.16127  | 1.15250  | -0.76004 |
| H  | 4.46950  | 2.19532  | 0.13225  |
| H  | 5.43168  | 0.56896  | -0.93795 |
| H  | 4.03125  | 1.86765  | -1.96368 |
| P  | 3.68176  | -2.25508 | -0.06957 |
| H  | 4.88037  | -2.36017 | -0.81016 |
| H  | 4.16106  | -2.68677 | 1.18087  |
| H  | 3.03724  | -3.42448 | -0.51010 |
| F  | 1.43222  | -2.84883 | 1.67484  |
| F  | -1.21429 | 4.75404  | -0.21986 |

**BF<sub>4</sub><sup>-</sup>**

E: -424.58174  
 G: -424.58985  
 Esp: -424.81973  
 Gcorr: -0.00811  
 ZPE: 0.01419  
 Esp + Gcorr: -424.82783

|   |          |          |          |
|---|----------|----------|----------|
| B | 0.00000  | 0.00000  | 0.00000  |
| F | 0.81256  | 0.81256  | 0.81256  |
| F | -0.81256 | -0.81256 | 0.81256  |
| F | -0.81256 | 0.81256  | -0.81256 |
| F | 0.81256  | -0.81256 | -0.81256 |

**THF**

E: -232.46692  
 G: -232.37196  
 Esp: -232.56510  
 Gcorr: 0.09496  
 ZPE: 0.11745  
 Esp + Gcorr: -232.47014

|   |          |          |          |
|---|----------|----------|----------|
| C | 1.16535  | -0.42702 | -0.13350 |
| O | -0.00009 | -1.25403 | -0.00026 |
| C | -1.16533 | -0.42689 | 0.13382  |
| C | -0.73151 | 0.99451  | -0.23156 |
| C | 0.73155  | 0.99455  | 0.23142  |
| H | 1.95280  | -0.82022 | 0.52031  |
| H | 1.52928  | -0.47350 | -1.17149 |
| H | -1.95325 | -0.82016 | -0.51936 |
| H | -1.52852 | -0.47318 | 1.17210  |
| H | -0.78638 | 1.14399  | -1.31654 |
| H | -1.34491 | 1.76007  | 0.25292  |
| H | 1.34498  | 1.75992  | -0.25331 |

|   |         |         |         |
|---|---------|---------|---------|
| H | 0.78641 | 1.14439 | 1.31634 |
|---|---------|---------|---------|

**THFH<sup>+</sup>**

E: -232.87871  
 G: -232.77326  
 Esp: -232.97547  
 Gcorr: 0.10546  
 ZPE: 0.13037  
 Esp + Gcorr: -232.87001

|   |          |          |          |
|---|----------|----------|----------|
| C | 1.23071  | -0.38551 | -0.13107 |
| O | -0.02920 | -1.22094 | 0.09375  |
| C | -1.25353 | -0.30048 | 0.14992  |
| C | -0.69469 | 1.04451  | -0.26417 |
| C | 0.76028  | 1.00572  | 0.23320  |
| H | 1.98027  | -0.83039 | 0.52008  |
| H | 1.48710  | -0.50117 | -1.18431 |
| H | -1.99609 | -0.74390 | -0.51159 |
| H | -1.56415 | -0.35508 | 1.19193  |
| H | -0.73118 | 1.15844  | -1.35166 |
| H | -1.26755 | 1.85321  | 0.19557  |
| H | 1.38570  | 1.75655  | -0.25552 |
| H | 0.80951  | 1.15692  | 1.31557  |
| H | -0.12663 | -1.91257 | -0.59729 |

**BF<sub>4</sub><sup>-</sup>•(THF)H<sup>+</sup>**

E: -657.51577  
 G: -657.40200  
 Esp: -657.83172  
 Gcorr: 0.11376  
 ZPE: 0.14687  
 Esp + Gcorr: -657.71795

|   |          |          |          |
|---|----------|----------|----------|
| B | -1.79646 | 0.02136  | -0.14757 |
| F | -1.28574 | -0.72703 | 1.01854  |
| F | -1.65154 | 1.37276  | 0.14928  |
| F | -0.98241 | -0.33677 | -1.22627 |
| F | -3.10884 | -0.34220 | -0.33971 |
| C | 1.75216  | -1.27240 | -0.01650 |
| O | 1.15328  | -0.42347 | 1.07457  |
| C | 1.44984  | 1.02966  | 0.80653  |
| C | 1.94246  | 1.04044  | -0.62767 |
| C | 2.66402  | -0.31069 | -0.75798 |
| H | 2.24945  | -2.09713 | 0.49109  |
| H | 0.91369  | -1.61816 | -0.61844 |
| H | 0.51991  | 1.56434  | 0.98880  |
| H | 2.21385  | 1.29717  | 1.53617  |
| H | 1.09248  | 1.08942  | -1.31256 |
| H | 2.60404  | 1.89060  | -0.81022 |
| H | 2.78733  | -0.62174 | -1.79820 |
| H | 3.65011  | -0.27294 | -0.28415 |
| H | 0.13111  | -0.57345 | 1.10587  |

**(BO<sub>2</sub>H)<sub>3</sub>**

E: -528.19226  
 G: -528.14892  
 Esp: -528.45227  
 Gcorr: 0.04335  
 ZPE: 0.07316  
 Esp + Gcorr: -528.40893

|   |          |          |          |
|---|----------|----------|----------|
| B | 0.41171  | -1.31614 | -0.00002 |
| B | -1.34587 | 0.30149  | 0.00005  |
| B | 0.93404  | 1.01474  | 0.00002  |
| O | 0.85076  | -2.60070 | -0.00019 |
| H | 0.10521  | -3.22280 | -0.00012 |
| O | -2.67780 | 0.56379  | -0.00015 |
| H | -2.84406 | 1.52043  | 0.00008  |



|   |          |          |          |
|---|----------|----------|----------|
| O | 1.82731  | 2.03685  | -0.00014 |
| H | 2.73872  | 1.70191  | 0.00036  |
| O | 1.34967  | -0.30307 | 0.00014  |
| O | -0.93764 | -1.01730 | 0.00026  |
| O | -0.41221 | 1.32044  | 0.00001  |
